# Supplementary material for: Hereditary Spastic Paraplegia: From Genes, Cells and Networks to Novel Pathways for Drug Discovery
Source: Brain Sci. 2021 Mar 22;11(3):403. doi: 10.3390/brainsci11030403 (PMC8004882; doi:10.3390/brainsci11030403)
Supplement: Supplementary file 1 [file brainsci-11-00403-s001.xlsx]

## Sheet: 6 direct enrichment.Component
#term ID	term description	observed gene count	background gene count	strength	false discovery rate	matching proteins in your network (IDs)	matching proteins in your network (labels)
GO:0071782	endoplasmic reticulum tubular network	4	22	2.77	3.22e-09	9606.ENSP00000351155,9606.ENSP00000377282,9606.ENSP00000438346,9606.ENSP00000480893	ATL1,ZFYVE27,REEP1,SPAST
GO:0005789	endoplasmic reticulum membrane	6	1022	1.28	9.11e-07	9606.ENSP00000245923,9606.ENSP00000310721,9606.ENSP00000351155,9606.ENSP00000377282,9606.ENSP00000438346,9606.ENSP00000480893	RTN2,CYP7B1,ATL1,ZFYVE27,REEP1,SPAST
GO:0098827	endoplasmic reticulum subcompartment	6	1025	1.28	9.11e-07	9606.ENSP00000245923,9606.ENSP00000310721,9606.ENSP00000351155,9606.ENSP00000377282,9606.ENSP00000438346,9606.ENSP00000480893	RTN2,CYP7B1,ATL1,ZFYVE27,REEP1,SPAST
GO:0030424	axon	3	530	1.27	0.0037	9606.ENSP00000351155,9606.ENSP00000377282,9606.ENSP00000480893	ATL1,ZFYVE27,SPAST
GO:0030176	integral component of endoplasmic reticulum membrane	2	147	1.65	0.0074	9606.ENSP00000245923,9606.ENSP00000377282	RTN2,ZFYVE27

## Sheet: 6 direct enrichment.Process
#term ID	term description	observed gene count	background gene count	strength	false discovery rate	matching proteins in your network (IDs)	matching proteins in your network (labels)
GO:0071786	endoplasmic reticulum tubular network organization	3	12	2.91	2e-06	9606.ENSP00000351155,9606.ENSP00000377282,9606.ENSP00000438346	ATL1,ZFYVE27,REEP1
GO:0010256	endomembrane system organization	4	337	1.59	0.00012	9606.ENSP00000351155,9606.ENSP00000377282,9606.ENSP00000438346,9606.ENSP00000480893	ATL1,ZFYVE27,REEP1,SPAST

## Sheet: 6 indirect enrichment.Component
#term ID	term description	observed gene count	background gene count	strength	false discovery rate	matching proteins in your network (IDs)	matching proteins in your network (labels)
GO:0031090	organelle membrane	22	3337	0.7	1.28e-11	9606.ENSP00000217402,9606.ENSP00000245923,9606.ENSP00000254950,9606.ENSP00000258415,9606.ENSP00000267484,9606.ENSP00000268053,9606.ENSP00000297679,9606.ENSP00000310721,9606.ENSP00000317468,9606.ENSP00000351155,9606.ENSP00000356602,9606.ENSP00000358421,9606.ENSP00000358903,9606.ENSP00000360918,9606.ENSP00000377282,9606.ENSP00000405575,9606.ENSP00000432279,9606.ENSP00000438346,9606.ENSP00000445122,…	CHMP4B,RTN2,VPS4A,CYP27A1,RTN1,CYP11A1,HSD3B7,CYP7B1,CHMP6,ATL1,VTA1,HSD3B1,CYP17A1,CH25H,ZFYVE27,CHMP3,CHMP1B,REEP1,HSD3B2,HSD17B6,ENSG00000249884,SPAST
GO:0000815	ESCRT III complex	5	11	2.53	7.69e-10	9606.ENSP00000217402,9606.ENSP00000317468,9606.ENSP00000405575,9606.ENSP00000432279,9606.ENSP00000474823	CHMP4B,CHMP6,CHMP3,CHMP1B,ENSG00000249884
GO:0012505	endomembrane system	21	4347	0.56	1.71e-08	9606.ENSP00000217402,9606.ENSP00000245923,9606.ENSP00000254950,9606.ENSP00000267484,9606.ENSP00000297679,9606.ENSP00000310721,9606.ENSP00000317468,9606.ENSP00000351155,9606.ENSP00000356602,9606.ENSP00000358421,9606.ENSP00000358903,9606.ENSP00000360918,9606.ENSP00000377282,9606.ENSP00000405575,9606.ENSP00000432279,9606.ENSP00000438346,9606.ENSP00000438399,9606.ENSP00000445122,9606.ENSP00000451406,…	CHMP4B,RTN2,VPS4A,RTN1,HSD3B7,CYP7B1,CHMP6,ATL1,VTA1,HSD3B1,CYP17A1,CH25H,ZFYVE27,CHMP3,CHMP1B,REEP1,IST1,HSD3B2,HSD17B6,ENSG00000249884,SPAST
GO:0005789	endoplasmic reticulum membrane	12	1022	0.95	5.53e-08	9606.ENSP00000245923,9606.ENSP00000267484,9606.ENSP00000297679,9606.ENSP00000310721,9606.ENSP00000351155,9606.ENSP00000358421,9606.ENSP00000358903,9606.ENSP00000360918,9606.ENSP00000377282,9606.ENSP00000438346,9606.ENSP00000445122,9606.ENSP00000480893	RTN2,RTN1,HSD3B7,CYP7B1,ATL1,HSD3B1,CYP17A1,CH25H,ZFYVE27,REEP1,HSD3B2,SPAST
GO:0098827	endoplasmic reticulum subcompartment	12	1025	0.94	5.53e-08	9606.ENSP00000245923,9606.ENSP00000267484,9606.ENSP00000297679,9606.ENSP00000310721,9606.ENSP00000351155,9606.ENSP00000358421,9606.ENSP00000358903,9606.ENSP00000360918,9606.ENSP00000377282,9606.ENSP00000438346,9606.ENSP00000445122,9606.ENSP00000480893	RTN2,RTN1,HSD3B7,CYP7B1,ATL1,HSD3B1,CYP17A1,CH25H,ZFYVE27,REEP1,HSD3B2,SPAST
GO:0010008	endosome membrane	9	457	1.17	8e-08	9606.ENSP00000217402,9606.ENSP00000254950,9606.ENSP00000317468,9606.ENSP00000356602,9606.ENSP00000377282,9606.ENSP00000405575,9606.ENSP00000432279,9606.ENSP00000451406,9606.ENSP00000474823	CHMP4B,VPS4A,CHMP6,VTA1,ZFYVE27,CHMP3,CHMP1B,HSD17B6,ENSG00000249884
GO:0031902	late endosome membrane	6	125	1.56	2.37e-07	9606.ENSP00000217402,9606.ENSP00000254950,9606.ENSP00000317468,9606.ENSP00000405575,9606.ENSP00000432279,9606.ENSP00000474823	CHMP4B,VPS4A,CHMP6,CHMP3,CHMP1B,ENSG00000249884
GO:0071782	endoplasmic reticulum tubular network	4	22	2.14	4.64e-07	9606.ENSP00000351155,9606.ENSP00000377282,9606.ENSP00000438346,9606.ENSP00000480893	ATL1,ZFYVE27,REEP1,SPAST
GO:0005768	endosome	10	876	0.93	1.1e-06	9606.ENSP00000217402,9606.ENSP00000254950,9606.ENSP00000317468,9606.ENSP00000356602,9606.ENSP00000377282,9606.ENSP00000405575,9606.ENSP00000432279,9606.ENSP00000451406,9606.ENSP00000474823,9606.ENSP00000480893	CHMP4B,VPS4A,CHMP6,VTA1,ZFYVE27,CHMP3,CHMP1B,HSD17B6,ENSG00000249884,SPAST
GO:0005783	endoplasmic reticulum	13	1796	0.74	1.21e-06	9606.ENSP00000245923,9606.ENSP00000267484,9606.ENSP00000297679,9606.ENSP00000310721,9606.ENSP00000351155,9606.ENSP00000358421,9606.ENSP00000358903,9606.ENSP00000360918,9606.ENSP00000377282,9606.ENSP00000438346,9606.ENSP00000445122,9606.ENSP00000451406,9606.ENSP00000480893	RTN2,RTN1,HSD3B7,CYP7B1,ATL1,HSD3B1,CYP17A1,CH25H,ZFYVE27,REEP1,HSD3B2,HSD17B6,SPAST
GO:0016020	membrane	24	8420	0.33	1.86e-06	9606.ENSP00000217402,9606.ENSP00000245923,9606.ENSP00000254950,9606.ENSP00000258415,9606.ENSP00000267484,9606.ENSP00000268053,9606.ENSP00000297679,9606.ENSP00000310721,9606.ENSP00000317468,9606.ENSP00000331545,9606.ENSP00000351155,9606.ENSP00000356602,9606.ENSP00000358421,9606.ENSP00000358903,9606.ENSP00000360918,9606.ENSP00000377282,9606.ENSP00000405575,9606.ENSP00000420502,9606.ENSP00000432279,…	CHMP4B,RTN2,VPS4A,CYP27A1,RTN1,CYP11A1,HSD3B7,CYP7B1,CHMP6,OR1G1,ATL1,VTA1,HSD3B1,CYP17A1,CH25H,ZFYVE27,CHMP3,OR2A7,CHMP1B,REEP1,HSD3B2,HSD17B6,ENSG00000249884,SPAST
GO:0030496	midbody	5	165	1.36	2.02e-05	9606.ENSP00000217402,9606.ENSP00000254950,9606.ENSP00000432279,9606.ENSP00000438399,9606.ENSP00000480893	CHMP4B,VPS4A,CHMP1B,IST1,SPAST
GO:0098588	bounding membrane of organelle	12	1950	0.67	2.02e-05	9606.ENSP00000217402,9606.ENSP00000254950,9606.ENSP00000317468,9606.ENSP00000351155,9606.ENSP00000356602,9606.ENSP00000358421,9606.ENSP00000377282,9606.ENSP00000405575,9606.ENSP00000432279,9606.ENSP00000445122,9606.ENSP00000451406,9606.ENSP00000474823	CHMP4B,VPS4A,CHMP6,ATL1,VTA1,HSD3B1,ZFYVE27,CHMP3,CHMP1B,HSD3B2,HSD17B6,ENSG00000249884
GO:0030868	smooth endoplasmic reticulum membrane	2	7	2.33	0.00044	9606.ENSP00000358421,9606.ENSP00000445122	HSD3B1,HSD3B2
GO:0031410	cytoplasmic vesicle	11	2226	0.57	0.00044	9606.ENSP00000217402,9606.ENSP00000254950,9606.ENSP00000317468,9606.ENSP00000356602,9606.ENSP00000377282,9606.ENSP00000405575,9606.ENSP00000432279,9606.ENSP00000438399,9606.ENSP00000451406,9606.ENSP00000474823,9606.ENSP00000480893	CHMP4B,VPS4A,CHMP6,VTA1,ZFYVE27,CHMP3,CHMP1B,IST1,HSD17B6,ENSG00000249884,SPAST
GO:0031967	organelle envelope	8	1146	0.72	0.00053	9606.ENSP00000217402,9606.ENSP00000258415,9606.ENSP00000268053,9606.ENSP00000358421,9606.ENSP00000438346,9606.ENSP00000438399,9606.ENSP00000445122,9606.ENSP00000480893	CHMP4B,CYP27A1,CYP11A1,HSD3B1,REEP1,IST1,HSD3B2,SPAST
GO:0005737	cytoplasm	24	11238	0.21	0.0006	9606.ENSP00000217402,9606.ENSP00000245923,9606.ENSP00000254950,9606.ENSP00000258415,9606.ENSP00000267484,9606.ENSP00000268053,9606.ENSP00000297679,9606.ENSP00000310721,9606.ENSP00000313752,9606.ENSP00000317468,9606.ENSP00000351155,9606.ENSP00000356602,9606.ENSP00000358421,9606.ENSP00000358903,9606.ENSP00000360918,9606.ENSP00000377282,9606.ENSP00000405575,9606.ENSP00000432279,9606.ENSP00000438346,…	CHMP4B,RTN2,VPS4A,CYP27A1,RTN1,CYP11A1,HSD3B7,CYP7B1,SSNA1,CHMP6,ATL1,VTA1,HSD3B1,CYP17A1,CH25H,ZFYVE27,CHMP3,CHMP1B,REEP1,IST1,HSD3B2,HSD17B6,ENSG00000249884,SPAST
GO:0043227	membrane-bounded organelle	24	11244	0.21	0.0006	9606.ENSP00000217402,9606.ENSP00000245923,9606.ENSP00000254950,9606.ENSP00000258415,9606.ENSP00000267484,9606.ENSP00000268053,9606.ENSP00000297679,9606.ENSP00000310721,9606.ENSP00000313752,9606.ENSP00000317468,9606.ENSP00000351155,9606.ENSP00000356602,9606.ENSP00000358421,9606.ENSP00000358903,9606.ENSP00000360918,9606.ENSP00000377282,9606.ENSP00000405575,9606.ENSP00000432279,9606.ENSP00000438346,…	CHMP4B,RTN2,VPS4A,CYP27A1,RTN1,CYP11A1,HSD3B7,CYP7B1,SSNA1,CHMP6,ATL1,VTA1,HSD3B1,CYP17A1,CH25H,ZFYVE27,CHMP3,CHMP1B,REEP1,IST1,HSD3B2,HSD17B6,ENSG00000249884,SPAST
GO:0043229	intracellular organelle	24	12193	0.17	0.003	9606.ENSP00000217402,9606.ENSP00000245923,9606.ENSP00000254950,9606.ENSP00000258415,9606.ENSP00000267484,9606.ENSP00000268053,9606.ENSP00000297679,9606.ENSP00000310721,9606.ENSP00000313752,9606.ENSP00000317468,9606.ENSP00000351155,9606.ENSP00000356602,9606.ENSP00000358421,9606.ENSP00000358903,9606.ENSP00000360918,9606.ENSP00000377282,9606.ENSP00000405575,9606.ENSP00000432279,9606.ENSP00000438346,…	CHMP4B,RTN2,VPS4A,CYP27A1,RTN1,CYP11A1,HSD3B7,CYP7B1,SSNA1,CHMP6,ATL1,VTA1,HSD3B1,CYP17A1,CH25H,ZFYVE27,CHMP3,CHMP1B,REEP1,IST1,HSD3B2,HSD17B6,ENSG00000249884,SPAST
GO:0090543	Flemming body	2	28	1.73	0.0033	9606.ENSP00000254950,9606.ENSP00000438399	VPS4A,IST1
GO:0030176	integral component of endoplasmic reticulum membrane	3	147	1.19	0.0042	9606.ENSP00000245923,9606.ENSP00000267484,9606.ENSP00000377282	RTN2,RTN1,ZFYVE27
GO:0031966	mitochondrial membrane	5	679	0.74	0.0072	9606.ENSP00000258415,9606.ENSP00000268053,9606.ENSP00000358421,9606.ENSP00000438346,9606.ENSP00000445122	CYP27A1,CYP11A1,HSD3B1,REEP1,HSD3B2
GO:0043231	intracellular membrane-bounded organelle	21	10365	0.18	0.0119	9606.ENSP00000217402,9606.ENSP00000245923,9606.ENSP00000254950,9606.ENSP00000258415,9606.ENSP00000267484,9606.ENSP00000268053,9606.ENSP00000297679,9606.ENSP00000310721,9606.ENSP00000313752,9606.ENSP00000351155,9606.ENSP00000356602,9606.ENSP00000358421,9606.ENSP00000358903,9606.ENSP00000360918,9606.ENSP00000377282,9606.ENSP00000432279,9606.ENSP00000438346,9606.ENSP00000438399,9606.ENSP00000445122,…	CHMP4B,RTN2,VPS4A,CYP27A1,RTN1,CYP11A1,HSD3B7,CYP7B1,SSNA1,ATL1,VTA1,HSD3B1,CYP17A1,CH25H,ZFYVE27,CHMP1B,REEP1,IST1,HSD3B2,HSD17B6,SPAST
GO:0005811	lipid droplet	2	74	1.31	0.0164	9606.ENSP00000297679,9606.ENSP00000480893	HSD3B7,SPAST
GO:0005758	mitochondrial intermembrane space	2	79	1.28	0.0178	9606.ENSP00000358421,9606.ENSP00000445122	HSD3B1,HSD3B2
GO:0030424	axon	4	530	0.75	0.0178	9606.ENSP00000351155,9606.ENSP00000358903,9606.ENSP00000377282,9606.ENSP00000480893	ATL1,CYP17A1,ZFYVE27,SPAST
GO:0030117	membrane coat	2	88	1.23	0.0206	9606.ENSP00000217402,9606.ENSP00000432279	CHMP4B,CHMP1B
GO:0005623	cell	26	16271	0.08	0.0251	9606.ENSP00000217402,9606.ENSP00000245923,9606.ENSP00000254950,9606.ENSP00000258415,9606.ENSP00000267484,9606.ENSP00000268053,9606.ENSP00000297679,9606.ENSP00000310721,9606.ENSP00000313752,9606.ENSP00000317468,9606.ENSP00000331545,9606.ENSP00000351155,9606.ENSP00000356602,9606.ENSP00000358421,9606.ENSP00000358903,9606.ENSP00000360918,9606.ENSP00000377282,9606.ENSP00000405575,9606.ENSP00000420502,…	CHMP4B,RTN2,VPS4A,CYP27A1,RTN1,CYP11A1,HSD3B7,CYP7B1,SSNA1,CHMP6,OR1G1,ATL1,VTA1,HSD3B1,CYP17A1,CH25H,ZFYVE27,CHMP3,OR2A7,CHMP1B,REEP1,IST1,HSD3B2,HSD17B6,ENSG00000249884,SPAST
GO:0005815	microtubule organizing center	4	683	0.64	0.0343	9606.ENSP00000254950,9606.ENSP00000313752,9606.ENSP00000438399,9606.ENSP00000480893	VPS4A,SSNA1,IST1,SPAST
GO:0005829	cytosol	12	4958	0.26	0.0469	9606.ENSP00000217402,9606.ENSP00000254950,9606.ENSP00000313752,9606.ENSP00000317468,9606.ENSP00000356602,9606.ENSP00000360918,9606.ENSP00000377282,9606.ENSP00000405575,9606.ENSP00000432279,9606.ENSP00000438399,9606.ENSP00000474823,9606.ENSP00000480893	CHMP4B,VPS4A,SSNA1,CHMP6,VTA1,CH25H,ZFYVE27,CHMP3,CHMP1B,IST1,ENSG00000249884,SPAST

## Sheet: 6 indirect enrichment.Process
#term ID	term description	observed gene count	background gene count	strength	false discovery rate	matching proteins in your network (IDs)	matching proteins in your network (labels)
GO:0036258	multivesicular body assembly	8	31	2.29	1.06e-13	9606.ENSP00000217402,9606.ENSP00000254950,9606.ENSP00000317468,9606.ENSP00000356602,9606.ENSP00000405575,9606.ENSP00000432279,9606.ENSP00000438399,9606.ENSP00000474823	CHMP4B,VPS4A,CHMP6,VTA1,CHMP3,CHMP1B,IST1,ENSG00000249884
GO:0010256	endomembrane system organization	12	337	1.43	1.32e-12	9606.ENSP00000217402,9606.ENSP00000254950,9606.ENSP00000317468,9606.ENSP00000351155,9606.ENSP00000356602,9606.ENSP00000377282,9606.ENSP00000405575,9606.ENSP00000432279,9606.ENSP00000438346,9606.ENSP00000438399,9606.ENSP00000474823,9606.ENSP00000480893	CHMP4B,VPS4A,CHMP6,ATL1,VTA1,ZFYVE27,CHMP3,CHMP1B,REEP1,IST1,ENSG00000249884,SPAST
GO:0046755	viral budding	7	24	2.34	1.32e-12	9606.ENSP00000217402,9606.ENSP00000254950,9606.ENSP00000317468,9606.ENSP00000356602,9606.ENSP00000405575,9606.ENSP00000432279,9606.ENSP00000474823	CHMP4B,VPS4A,CHMP6,VTA1,CHMP3,CHMP1B,ENSG00000249884
GO:0006694	steroid biosynthetic process	9	126	1.73	8.67e-12	9606.ENSP00000258415,9606.ENSP00000268053,9606.ENSP00000297679,9606.ENSP00000310721,9606.ENSP00000358421,9606.ENSP00000358903,9606.ENSP00000360918,9606.ENSP00000445122,9606.ENSP00000451406	CYP27A1,CYP11A1,HSD3B7,CYP7B1,HSD3B1,CYP17A1,CH25H,HSD3B2,HSD17B6
GO:0000920	septum digestion after cytokinesis	6	18	2.4	2.94e-11	9606.ENSP00000217402,9606.ENSP00000254950,9606.ENSP00000317468,9606.ENSP00000405575,9606.ENSP00000432279,9606.ENSP00000474823	CHMP4B,VPS4A,CHMP6,CHMP3,CHMP1B,ENSG00000249884
GO:0039702	viral budding via host ESCRT complex	6	21	2.33	5.74e-11	9606.ENSP00000217402,9606.ENSP00000254950,9606.ENSP00000317468,9606.ENSP00000405575,9606.ENSP00000432279,9606.ENSP00000474823	CHMP4B,VPS4A,CHMP6,CHMP3,CHMP1B,ENSG00000249884
GO:0019058	viral life cycle	8	166	1.56	2.47e-09	9606.ENSP00000217402,9606.ENSP00000254950,9606.ENSP00000317468,9606.ENSP00000356602,9606.ENSP00000405575,9606.ENSP00000432279,9606.ENSP00000438399,9606.ENSP00000474823	CHMP4B,VPS4A,CHMP6,VTA1,CHMP3,CHMP1B,IST1,ENSG00000249884
GO:1904903	ESCRT III complex disassembly	4	10	2.48	1.22e-07	9606.ENSP00000254950,9606.ENSP00000356602,9606.ENSP00000432279,9606.ENSP00000438399	VPS4A,VTA1,CHMP1B,IST1
GO:0006702	androgen biosynthetic process	4	11	2.44	1.43e-07	9606.ENSP00000358421,9606.ENSP00000358903,9606.ENSP00000445122,9606.ENSP00000451406	HSD3B1,CYP17A1,HSD3B2,HSD17B6
GO:0007034	vacuolar transport	6	115	1.59	3.86e-07	9606.ENSP00000217402,9606.ENSP00000254950,9606.ENSP00000317468,9606.ENSP00000405575,9606.ENSP00000432279,9606.ENSP00000474823	CHMP4B,VPS4A,CHMP6,CHMP3,CHMP1B,ENSG00000249884
GO:1902188	positive regulation of viral release from host cell	4	17	2.25	5.12e-07	9606.ENSP00000217402,9606.ENSP00000254950,9606.ENSP00000405575,9606.ENSP00000474823	CHMP4B,VPS4A,CHMP3,ENSG00000249884
GO:0016236	macroautophagy	6	132	1.53	7.56e-07	9606.ENSP00000217402,9606.ENSP00000254950,9606.ENSP00000317468,9606.ENSP00000356602,9606.ENSP00000405575,9606.ENSP00000474823	CHMP4B,VPS4A,CHMP6,VTA1,CHMP3,ENSG00000249884
GO:0042446	hormone biosynthetic process	5	62	1.78	7.97e-07	9606.ENSP00000268053,9606.ENSP00000358421,9606.ENSP00000358903,9606.ENSP00000445122,9606.ENSP00000451406	CYP11A1,HSD3B1,CYP17A1,HSD3B2,HSD17B6
GO:0006699	bile acid biosynthetic process	4	27	2.05	2.16e-06	9606.ENSP00000258415,9606.ENSP00000297679,9606.ENSP00000310721,9606.ENSP00000360918	CYP27A1,HSD3B7,CYP7B1,CH25H
GO:0070925	organelle assembly	9	666	1.01	3.16e-06	9606.ENSP00000217402,9606.ENSP00000254950,9606.ENSP00000313752,9606.ENSP00000317468,9606.ENSP00000356602,9606.ENSP00000405575,9606.ENSP00000432279,9606.ENSP00000438399,9606.ENSP00000474823	CHMP4B,VPS4A,SSNA1,CHMP6,VTA1,CHMP3,CHMP1B,IST1,ENSG00000249884
GO:0051301	cell division	8	483	1.1	3.9e-06	9606.ENSP00000217402,9606.ENSP00000254950,9606.ENSP00000317468,9606.ENSP00000405575,9606.ENSP00000432279,9606.ENSP00000438399,9606.ENSP00000474823,9606.ENSP00000480893	CHMP4B,VPS4A,CHMP6,CHMP3,CHMP1B,IST1,ENSG00000249884,SPAST
GO:0035754	B cell chemotaxis	3	6	2.58	4.04e-06	9606.ENSP00000297679,9606.ENSP00000310721,9606.ENSP00000360918	HSD3B7,CYP7B1,CH25H
GO:0010824	regulation of centrosome duplication	4	40	1.88	6.9e-06	9606.ENSP00000217402,9606.ENSP00000405575,9606.ENSP00000432279,9606.ENSP00000474823	CHMP4B,CHMP3,CHMP1B,ENSG00000249884
GO:0034754	cellular hormone metabolic process	5	109	1.54	7.61e-06	9606.ENSP00000268053,9606.ENSP00000358421,9606.ENSP00000358903,9606.ENSP00000445122,9606.ENSP00000451406	CYP11A1,HSD3B1,CYP17A1,HSD3B2,HSD17B6
GO:0007080	mitotic metaphase plate congression	4	42	1.86	7.73e-06	9606.ENSP00000217402,9606.ENSP00000254950,9606.ENSP00000317468,9606.ENSP00000432279	CHMP4B,VPS4A,CHMP6,CHMP1B
GO:0022411	cellular component disassembly	7	364	1.16	7.78e-06	9606.ENSP00000254950,9606.ENSP00000356602,9606.ENSP00000405575,9606.ENSP00000432279,9606.ENSP00000438399,9606.ENSP00000474823,9606.ENSP00000480893	VPS4A,VTA1,CHMP3,CHMP1B,IST1,ENSG00000249884,SPAST
GO:0032984	protein-containing complex disassembly	6	220	1.31	7.93e-06	9606.ENSP00000254950,9606.ENSP00000356602,9606.ENSP00000405575,9606.ENSP00000432279,9606.ENSP00000438399,9606.ENSP00000474823	VPS4A,VTA1,CHMP3,CHMP1B,IST1,ENSG00000249884
GO:0006704	glucocorticoid biosynthetic process	3	10	2.35	1.05e-05	9606.ENSP00000358421,9606.ENSP00000358903,9606.ENSP00000445122	HSD3B1,CYP17A1,HSD3B2
GO:0006997	nucleus organization	5	124	1.48	1.17e-05	9606.ENSP00000217402,9606.ENSP00000254950,9606.ENSP00000317468,9606.ENSP00000432279,9606.ENSP00000480893	CHMP4B,VPS4A,CHMP6,CHMP1B,SPAST
GO:0016125	sterol metabolic process	5	127	1.47	1.2e-05	9606.ENSP00000258415,9606.ENSP00000268053,9606.ENSP00000310721,9606.ENSP00000358903,9606.ENSP00000360918	CYP27A1,CYP11A1,CYP7B1,CYP17A1,CH25H
GO:0071786	endoplasmic reticulum tubular network organization	3	12	2.27	1.42e-05	9606.ENSP00000351155,9606.ENSP00000377282,9606.ENSP00000438346	ATL1,ZFYVE27,REEP1
GO:0140014	mitotic nuclear division	5	136	1.44	1.55e-05	9606.ENSP00000217402,9606.ENSP00000254950,9606.ENSP00000317468,9606.ENSP00000432279,9606.ENSP00000480893	CHMP4B,VPS4A,CHMP6,CHMP1B,SPAST
GO:0045184	establishment of protein localization	11	1467	0.75	1.67e-05	9606.ENSP00000217402,9606.ENSP00000245923,9606.ENSP00000254950,9606.ENSP00000313752,9606.ENSP00000317468,9606.ENSP00000356602,9606.ENSP00000405575,9606.ENSP00000432279,9606.ENSP00000438346,9606.ENSP00000438399,9606.ENSP00000474823	CHMP4B,RTN2,VPS4A,SSNA1,CHMP6,VTA1,CHMP3,CHMP1B,REEP1,IST1,ENSG00000249884
GO:0031468	nuclear envelope reassembly	3	15	2.18	2.2e-05	9606.ENSP00000217402,9606.ENSP00000254950,9606.ENSP00000480893	CHMP4B,VPS4A,SPAST
GO:0061640	cytoskeleton-dependent cytokinesis	4	64	1.67	2.36e-05	9606.ENSP00000217402,9606.ENSP00000254950,9606.ENSP00000438399,9606.ENSP00000480893	CHMP4B,VPS4A,IST1,SPAST
GO:0055114	oxidation-reduction process	9	932	0.86	2.41e-05	9606.ENSP00000258415,9606.ENSP00000268053,9606.ENSP00000297679,9606.ENSP00000310721,9606.ENSP00000358421,9606.ENSP00000358903,9606.ENSP00000360918,9606.ENSP00000445122,9606.ENSP00000451406	CYP27A1,CYP11A1,HSD3B7,CYP7B1,HSD3B1,CYP17A1,CH25H,HSD3B2,HSD17B6
GO:0008104	protein localization	12	1966	0.66	3.28e-05	9606.ENSP00000217402,9606.ENSP00000245923,9606.ENSP00000254950,9606.ENSP00000313752,9606.ENSP00000317468,9606.ENSP00000356602,9606.ENSP00000377282,9606.ENSP00000405575,9606.ENSP00000432279,9606.ENSP00000438346,9606.ENSP00000438399,9606.ENSP00000474823	CHMP4B,RTN2,VPS4A,SSNA1,CHMP6,VTA1,ZFYVE27,CHMP3,CHMP1B,REEP1,IST1,ENSG00000249884
GO:0016197	endosomal transport	5	185	1.31	5e-05	9606.ENSP00000217402,9606.ENSP00000254950,9606.ENSP00000317468,9606.ENSP00000405575,9606.ENSP00000474823	CHMP4B,VPS4A,CHMP6,CHMP3,ENSG00000249884
GO:0015031	protein transport	10	1391	0.73	6.5e-05	9606.ENSP00000217402,9606.ENSP00000245923,9606.ENSP00000254950,9606.ENSP00000313752,9606.ENSP00000317468,9606.ENSP00000356602,9606.ENSP00000405575,9606.ENSP00000432279,9606.ENSP00000438399,9606.ENSP00000474823	CHMP4B,RTN2,VPS4A,SSNA1,CHMP6,VTA1,CHMP3,CHMP1B,IST1,ENSG00000249884
GO:0071985	multivesicular body sorting pathway	3	28	1.91	9.04e-05	9606.ENSP00000356602,9606.ENSP00000405575,9606.ENSP00000474823	VTA1,CHMP3,ENSG00000249884
GO:0022607	cellular component assembly	12	2343	0.59	0.00016	9606.ENSP00000217402,9606.ENSP00000254950,9606.ENSP00000313752,9606.ENSP00000317468,9606.ENSP00000351155,9606.ENSP00000356602,9606.ENSP00000377282,9606.ENSP00000405575,9606.ENSP00000432279,9606.ENSP00000438399,9606.ENSP00000474823,9606.ENSP00000480893	CHMP4B,VPS4A,SSNA1,CHMP6,ATL1,VTA1,ZFYVE27,CHMP3,CHMP1B,IST1,ENSG00000249884,SPAST
GO:0061763	multivesicular body-lysosome fusion	2	3	2.7	0.00016	9606.ENSP00000405575,9606.ENSP00000474823	CHMP3,ENSG00000249884
GO:1901615	organic hydroxy compound metabolic process	6	425	1.03	0.00016	9606.ENSP00000258415,9606.ENSP00000268053,9606.ENSP00000297679,9606.ENSP00000310721,9606.ENSP00000358903,9606.ENSP00000360918	CYP27A1,CYP11A1,HSD3B7,CYP7B1,CYP17A1,CH25H
GO:0007049	cell cycle	9	1263	0.73	0.0002	9606.ENSP00000217402,9606.ENSP00000254950,9606.ENSP00000313752,9606.ENSP00000317468,9606.ENSP00000405575,9606.ENSP00000432279,9606.ENSP00000438399,9606.ENSP00000474823,9606.ENSP00000480893	CHMP4B,VPS4A,SSNA1,CHMP6,CHMP3,CHMP1B,IST1,ENSG00000249884,SPAST
GO:0010564	regulation of cell cycle process	7	684	0.89	0.00021	9606.ENSP00000217402,9606.ENSP00000254950,9606.ENSP00000313752,9606.ENSP00000405575,9606.ENSP00000432279,9606.ENSP00000474823,9606.ENSP00000480893	CHMP4B,VPS4A,SSNA1,CHMP3,CHMP1B,ENSG00000249884,SPAST
GO:0061024	membrane organization	7	729	0.86	0.00028	9606.ENSP00000217402,9606.ENSP00000254950,9606.ENSP00000351155,9606.ENSP00000405575,9606.ENSP00000438346,9606.ENSP00000474823,9606.ENSP00000480893	CHMP4B,VPS4A,ATL1,CHMP3,REEP1,ENSG00000249884,SPAST
GO:0090611	ubiquitin-independent protein catabolic process via the multivesicular body sorting pathway	2	5	2.48	0.00028	9606.ENSP00000217402,9606.ENSP00000254950	CHMP4B,VPS4A
GO:0006705	mineralocorticoid biosynthetic process	2	6	2.4	0.00036	9606.ENSP00000358421,9606.ENSP00000445122	HSD3B1,HSD3B2
GO:0009838	abscission	2	6	2.4	0.00036	9606.ENSP00000254950,9606.ENSP00000438399	VPS4A,IST1
GO:0019076	viral release from host cell	2	6	2.4	0.00036	9606.ENSP00000254950,9606.ENSP00000438399	VPS4A,IST1
GO:0043933	protein-containing complex subunit organization	10	1770	0.63	0.00036	9606.ENSP00000217402,9606.ENSP00000254950,9606.ENSP00000317468,9606.ENSP00000351155,9606.ENSP00000356602,9606.ENSP00000405575,9606.ENSP00000432279,9606.ENSP00000438399,9606.ENSP00000474823,9606.ENSP00000480893	CHMP4B,VPS4A,CHMP6,ATL1,VTA1,CHMP3,CHMP1B,IST1,ENSG00000249884,SPAST
GO:0051641	cellular localization	11	2180	0.58	0.00036	9606.ENSP00000217402,9606.ENSP00000245923,9606.ENSP00000254950,9606.ENSP00000313752,9606.ENSP00000317468,9606.ENSP00000377282,9606.ENSP00000405575,9606.ENSP00000432279,9606.ENSP00000438346,9606.ENSP00000474823,9606.ENSP00000480893	CHMP4B,RTN2,VPS4A,SSNA1,CHMP6,ZFYVE27,CHMP3,CHMP1B,REEP1,ENSG00000249884,SPAST
GO:0052192	movement in environment of other organism involved in symbiotic interaction	2	6	2.4	0.00036	9606.ENSP00000254950,9606.ENSP00000438399	VPS4A,IST1
GO:0006996	organelle organization	13	3131	0.49	0.0004	9606.ENSP00000217402,9606.ENSP00000254950,9606.ENSP00000313752,9606.ENSP00000317468,9606.ENSP00000351155,9606.ENSP00000356602,9606.ENSP00000377282,9606.ENSP00000405575,9606.ENSP00000432279,9606.ENSP00000438346,9606.ENSP00000438399,9606.ENSP00000474823,9606.ENSP00000480893	CHMP4B,VPS4A,SSNA1,CHMP6,ATL1,VTA1,ZFYVE27,CHMP3,CHMP1B,REEP1,IST1,ENSG00000249884,SPAST
GO:1903047	mitotic cell cycle process	6	564	0.9	0.00053	9606.ENSP00000217402,9606.ENSP00000254950,9606.ENSP00000313752,9606.ENSP00000317468,9606.ENSP00000432279,9606.ENSP00000480893	CHMP4B,VPS4A,SSNA1,CHMP6,CHMP1B,SPAST
GO:0051640	organelle localization	6	574	0.9	0.00056	9606.ENSP00000217402,9606.ENSP00000254950,9606.ENSP00000313752,9606.ENSP00000317468,9606.ENSP00000432279,9606.ENSP00000480893	CHMP4B,VPS4A,SSNA1,CHMP6,CHMP1B,SPAST
GO:0022402	cell cycle process	7	890	0.77	0.00077	9606.ENSP00000217402,9606.ENSP00000254950,9606.ENSP00000313752,9606.ENSP00000317468,9606.ENSP00000432279,9606.ENSP00000438399,9606.ENSP00000480893	CHMP4B,VPS4A,SSNA1,CHMP6,CHMP1B,IST1,SPAST
GO:0051656	establishment of organelle localization	5	387	0.99	0.00086	9606.ENSP00000217402,9606.ENSP00000254950,9606.ENSP00000317468,9606.ENSP00000432279,9606.ENSP00000480893	CHMP4B,VPS4A,CHMP6,CHMP1B,SPAST
GO:0010458	exit from mitosis	2	12	2.1	0.00088	9606.ENSP00000217402,9606.ENSP00000480893	CHMP4B,SPAST
GO:0051649	establishment of localization in cell	9	1616	0.62	0.00088	9606.ENSP00000217402,9606.ENSP00000245923,9606.ENSP00000254950,9606.ENSP00000313752,9606.ENSP00000317468,9606.ENSP00000405575,9606.ENSP00000432279,9606.ENSP00000474823,9606.ENSP00000480893	CHMP4B,RTN2,VPS4A,SSNA1,CHMP6,CHMP3,CHMP1B,ENSG00000249884,SPAST
GO:0090148	membrane fission	2	12	2.1	0.00088	9606.ENSP00000217402,9606.ENSP00000480893	CHMP4B,SPAST
GO:0051179	localization	16	5233	0.36	0.0011	9606.ENSP00000217402,9606.ENSP00000245923,9606.ENSP00000254950,9606.ENSP00000297679,9606.ENSP00000310721,9606.ENSP00000313752,9606.ENSP00000317468,9606.ENSP00000356602,9606.ENSP00000360918,9606.ENSP00000377282,9606.ENSP00000405575,9606.ENSP00000432279,9606.ENSP00000438346,9606.ENSP00000438399,9606.ENSP00000474823,9606.ENSP00000480893	CHMP4B,RTN2,VPS4A,HSD3B7,CYP7B1,SSNA1,CHMP6,VTA1,CH25H,ZFYVE27,CHMP3,CHMP1B,REEP1,IST1,ENSG00000249884,SPAST
GO:0016192	vesicle-mediated transport	9	1699	0.6	0.0012	9606.ENSP00000217402,9606.ENSP00000254950,9606.ENSP00000317468,9606.ENSP00000356602,9606.ENSP00000377282,9606.ENSP00000405575,9606.ENSP00000438399,9606.ENSP00000474823,9606.ENSP00000480893	CHMP4B,VPS4A,CHMP6,VTA1,ZFYVE27,CHMP3,IST1,ENSG00000249884,SPAST
GO:0007041	lysosomal transport	3	90	1.4	0.0013	9606.ENSP00000254950,9606.ENSP00000405575,9606.ENSP00000474823	VPS4A,CHMP3,ENSG00000249884
GO:0032506	cytokinetic process	2	17	1.95	0.0015	9606.ENSP00000254950,9606.ENSP00000480893	VPS4A,SPAST
GO:1902187	negative regulation of viral release from host cell	2	17	1.95	0.0015	9606.ENSP00000405575,9606.ENSP00000474823	CHMP3,ENSG00000249884
GO:0046907	intracellular transport	8	1390	0.64	0.0017	9606.ENSP00000217402,9606.ENSP00000245923,9606.ENSP00000254950,9606.ENSP00000313752,9606.ENSP00000317468,9606.ENSP00000405575,9606.ENSP00000474823,9606.ENSP00000480893	CHMP4B,RTN2,VPS4A,SSNA1,CHMP6,CHMP3,ENSG00000249884,SPAST
GO:2000641	regulation of early endosome to late endosome transport	2	18	1.92	0.0017	9606.ENSP00000405575,9606.ENSP00000474823	CHMP3,ENSG00000249884
GO:0090174	organelle membrane fusion	3	102	1.35	0.0018	9606.ENSP00000254950,9606.ENSP00000405575,9606.ENSP00000474823	VPS4A,CHMP3,ENSG00000249884
GO:1901673	regulation of mitotic spindle assembly	2	20	1.88	0.002	9606.ENSP00000217402,9606.ENSP00000432279	CHMP4B,CHMP1B
GO:0008203	cholesterol metabolic process	3	109	1.32	0.0022	9606.ENSP00000268053,9606.ENSP00000310721,9606.ENSP00000360918	CYP11A1,CYP7B1,CH25H
GO:0051259	protein complex oligomerization	5	512	0.87	0.0026	9606.ENSP00000217402,9606.ENSP00000351155,9606.ENSP00000405575,9606.ENSP00000474823,9606.ENSP00000480893	CHMP4B,ATL1,CHMP3,ENSG00000249884,SPAST
GO:0097352	autophagosome maturation	2	26	1.76	0.003	9606.ENSP00000405575,9606.ENSP00000474823	CHMP3,ENSG00000249884
GO:0008207	C21-steroid hormone metabolic process	2	28	1.73	0.0033	9606.ENSP00000268053,9606.ENSP00000358903	CYP11A1,CYP17A1
GO:0051234	establishment of localization	13	4248	0.36	0.0062	9606.ENSP00000217402,9606.ENSP00000245923,9606.ENSP00000254950,9606.ENSP00000313752,9606.ENSP00000317468,9606.ENSP00000356602,9606.ENSP00000377282,9606.ENSP00000405575,9606.ENSP00000432279,9606.ENSP00000438346,9606.ENSP00000438399,9606.ENSP00000474823,9606.ENSP00000480893	CHMP4B,RTN2,VPS4A,SSNA1,CHMP6,VTA1,ZFYVE27,CHMP3,CHMP1B,REEP1,IST1,ENSG00000249884,SPAST
GO:0043902	positive regulation of multi-organism process	4	394	0.88	0.0077	9606.ENSP00000217402,9606.ENSP00000254950,9606.ENSP00000405575,9606.ENSP00000474823	CHMP4B,VPS4A,CHMP3,ENSG00000249884
GO:0072657	protein localization to membrane	4	405	0.87	0.0084	9606.ENSP00000217402,9606.ENSP00000313752,9606.ENSP00000377282,9606.ENSP00000438346	CHMP4B,SSNA1,ZFYVE27,REEP1
GO:0000281	mitotic cytokinesis	2	50	1.48	0.0092	9606.ENSP00000217402,9606.ENSP00000480893	CHMP4B,SPAST
GO:0006810	transport	12	4130	0.34	0.0159	9606.ENSP00000217402,9606.ENSP00000245923,9606.ENSP00000254950,9606.ENSP00000313752,9606.ENSP00000317468,9606.ENSP00000356602,9606.ENSP00000377282,9606.ENSP00000405575,9606.ENSP00000432279,9606.ENSP00000438399,9606.ENSP00000474823,9606.ENSP00000480893	CHMP4B,RTN2,VPS4A,SSNA1,CHMP6,VTA1,ZFYVE27,CHMP3,CHMP1B,IST1,ENSG00000249884,SPAST
GO:0040017	positive regulation of locomotion	4	503	0.78	0.0175	9606.ENSP00000217402,9606.ENSP00000254950,9606.ENSP00000405575,9606.ENSP00000474823	CHMP4B,VPS4A,CHMP3,ENSG00000249884
GO:0044772	mitotic cell cycle phase transition	3	254	0.95	0.0191	9606.ENSP00000217402,9606.ENSP00000313752,9606.ENSP00000480893	CHMP4B,SSNA1,SPAST
GO:0050772	positive regulation of axonogenesis	2	76	1.3	0.0196	9606.ENSP00000377282,9606.ENSP00000438399	ZFYVE27,IST1
GO:0009987	cellular process	25	14652	0.11	0.0212	9606.ENSP00000217402,9606.ENSP00000254950,9606.ENSP00000258415,9606.ENSP00000267484,9606.ENSP00000268053,9606.ENSP00000297679,9606.ENSP00000310721,9606.ENSP00000313752,9606.ENSP00000317468,9606.ENSP00000331545,9606.ENSP00000351155,9606.ENSP00000356602,9606.ENSP00000358421,9606.ENSP00000358903,9606.ENSP00000360918,9606.ENSP00000377282,9606.ENSP00000405575,9606.ENSP00000420502,9606.ENSP00000432279,…	CHMP4B,VPS4A,CYP27A1,RTN1,CYP11A1,HSD3B7,CYP7B1,SSNA1,CHMP6,OR1G1,ATL1,VTA1,HSD3B1,CYP17A1,CH25H,ZFYVE27,CHMP3,OR2A7,CHMP1B,REEP1,IST1,HSD3B2,HSD17B6,ENSG00000249884,SPAST
GO:0051258	protein polymerization	2	83	1.26	0.0225	9606.ENSP00000405575,9606.ENSP00000474823	CHMP3,ENSG00000249884
GO:0032465	regulation of cytokinesis	2	84	1.25	0.0229	9606.ENSP00000254950,9606.ENSP00000480893	VPS4A,SPAST
GO:0061387	regulation of extent of cell growth	2	96	1.2	0.0285	9606.ENSP00000377282,9606.ENSP00000438399	ZFYVE27,IST1
GO:0034613	cellular protein localization	6	1367	0.52	0.0305	9606.ENSP00000217402,9606.ENSP00000245923,9606.ENSP00000254950,9606.ENSP00000313752,9606.ENSP00000377282,9606.ENSP00000438346	CHMP4B,RTN2,VPS4A,SSNA1,ZFYVE27,REEP1
GO:0007346	regulation of mitotic cell cycle	4	608	0.69	0.0308	9606.ENSP00000217402,9606.ENSP00000254950,9606.ENSP00000313752,9606.ENSP00000432279	CHMP4B,VPS4A,SSNA1,CHMP1B
GO:0051260	protein homooligomerization	3	312	0.86	0.0308	9606.ENSP00000217402,9606.ENSP00000351155,9606.ENSP00000480893	CHMP4B,ATL1,SPAST
GO:0009056	catabolic process	7	1859	0.45	0.0337	9606.ENSP00000217402,9606.ENSP00000254950,9606.ENSP00000317468,9606.ENSP00000356602,9606.ENSP00000405575,9606.ENSP00000451406,9606.ENSP00000474823	CHMP4B,VPS4A,CHMP6,VTA1,CHMP3,HSD17B6,ENSG00000249884
GO:0032386	regulation of intracellular transport	3	335	0.83	0.0362	9606.ENSP00000405575,9606.ENSP00000438346,9606.ENSP00000474823	CHMP3,REEP1,ENSG00000249884
GO:0051291	protein heterooligomerization	2	126	1.08	0.0448	9606.ENSP00000405575,9606.ENSP00000474823	CHMP3,ENSG00000249884
GO:0065003	protein-containing complex assembly	6	1514	0.47	0.0462	9606.ENSP00000217402,9606.ENSP00000317468,9606.ENSP00000351155,9606.ENSP00000405575,9606.ENSP00000474823,9606.ENSP00000480893	CHMP4B,CHMP6,ATL1,CHMP3,ENSG00000249884,SPAST
GO:0010970	transport along microtubule	2	129	1.07	0.0463	9606.ENSP00000313752,9606.ENSP00000480893	SSNA1,SPAST
GO:0051704	multi-organism process	8	2514	0.38	0.048	9606.ENSP00000217402,9606.ENSP00000254950,9606.ENSP00000317468,9606.ENSP00000356602,9606.ENSP00000405575,9606.ENSP00000432279,9606.ENSP00000438399,9606.ENSP00000474823	CHMP4B,VPS4A,CHMP6,VTA1,CHMP3,CHMP1B,IST1,ENSG00000249884

## Sheet: 15 direct enrichment.Process
#term ID	term description	observed gene count	background gene count	strength	false discovery rate	matching proteins in your network (IDs)	matching proteins in your network (labels)
GO:0071786	endoplasmic reticulum tubular network organization	3	12	2.51	0.0001	9606.ENSP00000351155,9606.ENSP00000377282,9606.ENSP00000438346	ATL1,ZFYVE27,REEP1
GO:0010256	endomembrane system organization	5	337	1.29	0.0013	9606.ENSP00000351155,9606.ENSP00000377282,9606.ENSP00000379721,9606.ENSP00000438346,9606.ENSP00000480893	ATL1,ZFYVE27,USP8,REEP1,SPAST
GO:0061640	cytoskeleton-dependent cytokinesis	3	64	1.79	0.0026	9606.ENSP00000318016,9606.ENSP00000379721,9606.ENSP00000480893	KIAA0196,USP8,SPAST
GO:0051641	cellular localization	8	2180	0.68	0.0077	9606.ENSP00000245923,9606.ENSP00000297562,9606.ENSP00000297661,9606.ENSP00000318016,9606.ENSP00000373620,9606.ENSP00000377282,9606.ENSP00000438346,9606.ENSP00000480893	RTN2,AP5Z1,UBAP1,KIAA0196,HSPD1,ZFYVE27,REEP1,SPAST
GO:0051179	localization	11	5233	0.44	0.0197	9606.ENSP00000245923,9606.ENSP00000297562,9606.ENSP00000297661,9606.ENSP00000310721,9606.ENSP00000318016,9606.ENSP00000337452,9606.ENSP00000373620,9606.ENSP00000376587,9606.ENSP00000377282,9606.ENSP00000438346,9606.ENSP00000480893	RTN2,AP5Z1,UBAP1,CYP7B1,KIAA0196,NIPA1,HSPD1,SLC33A1,ZFYVE27,REEP1,SPAST
GO:0051234	establishment of localization	10	4248	0.49	0.0197	9606.ENSP00000245923,9606.ENSP00000297562,9606.ENSP00000297661,9606.ENSP00000318016,9606.ENSP00000337452,9606.ENSP00000373620,9606.ENSP00000376587,9606.ENSP00000377282,9606.ENSP00000438346,9606.ENSP00000480893	RTN2,AP5Z1,UBAP1,KIAA0196,NIPA1,HSPD1,SLC33A1,ZFYVE27,REEP1,SPAST
GO:0008104	protein localization	7	1966	0.67	0.0221	9606.ENSP00000245923,9606.ENSP00000297562,9606.ENSP00000297661,9606.ENSP00000318016,9606.ENSP00000373620,9606.ENSP00000377282,9606.ENSP00000438346	RTN2,AP5Z1,UBAP1,KIAA0196,HSPD1,ZFYVE27,REEP1
GO:0016197	endosomal transport	3	185	1.33	0.0224	9606.ENSP00000297562,9606.ENSP00000297661,9606.ENSP00000318016	AP5Z1,UBAP1,KIAA0196
GO:0046907	intracellular transport	6	1390	0.75	0.0224	9606.ENSP00000245923,9606.ENSP00000297562,9606.ENSP00000297661,9606.ENSP00000318016,9606.ENSP00000373620,9606.ENSP00000480893	RTN2,AP5Z1,UBAP1,KIAA0196,HSPD1,SPAST
GO:0042886	amide transport	6	1440	0.74	0.023	9606.ENSP00000245923,9606.ENSP00000297562,9606.ENSP00000297661,9606.ENSP00000318016,9606.ENSP00000373620,9606.ENSP00000376587	RTN2,AP5Z1,UBAP1,KIAA0196,HSPD1,SLC33A1
GO:0045184	establishment of protein localization	6	1467	0.73	0.0234	9606.ENSP00000245923,9606.ENSP00000297562,9606.ENSP00000297661,9606.ENSP00000318016,9606.ENSP00000373620,9606.ENSP00000438346	RTN2,AP5Z1,UBAP1,KIAA0196,HSPD1,REEP1
GO:0000281	mitotic cytokinesis	2	50	1.72	0.03	9606.ENSP00000379721,9606.ENSP00000480893	USP8,SPAST
GO:0065002	intracellular protein transmembrane transport	2	49	1.73	0.03	9606.ENSP00000245923,9606.ENSP00000373620	RTN2,HSPD1
GO:0006810	transport	9	4130	0.45	0.0366	9606.ENSP00000245923,9606.ENSP00000297562,9606.ENSP00000297661,9606.ENSP00000318016,9606.ENSP00000337452,9606.ENSP00000373620,9606.ENSP00000376587,9606.ENSP00000377282,9606.ENSP00000480893	RTN2,AP5Z1,UBAP1,KIAA0196,NIPA1,HSPD1,SLC33A1,ZFYVE27,SPAST

## Sheet: 15 indirect enrichment.Componen
#term ID	term description	observed gene count	background gene count	strength	false discovery rate	matching proteins in your network (IDs)	matching proteins in your network (labels)
GO:0005768	endosome	22	876	1.15	3.8e-19	9606.ENSP00000240079,9606.ENSP00000251968,9606.ENSP00000267202,9606.ENSP00000282633,9606.ENSP00000297661,9606.ENSP00000304697,9606.ENSP00000318016,9606.ENSP00000318629,9606.ENSP00000320416,9606.ENSP00000324810,9606.ENSP00000331201,9606.ENSP00000337452,9606.ENSP00000363482,9606.ENSP00000366565,9606.ENSP00000373620,9606.ENSP00000377282,9606.ENSP00000379721,9606.ENSP00000388107,9606.ENSP00000441543,…	CCDC53,TSG101,VPS37B,FAM21A,UBAP1,UBB,KIAA0196,VPS37A,VPS37D,MVB12A,HGS,NIPA1,FAM21C,VPS28,HSPD1,ZFYVE27,USP8,UBA52,UBC,SPAST,KIAA1033,WASH1
GO:0010008	endosome membrane	16	457	1.29	2.29e-15	9606.ENSP00000251968,9606.ENSP00000267202,9606.ENSP00000282633,9606.ENSP00000297661,9606.ENSP00000304697,9606.ENSP00000318629,9606.ENSP00000320416,9606.ENSP00000324810,9606.ENSP00000331201,9606.ENSP00000363482,9606.ENSP00000366565,9606.ENSP00000377282,9606.ENSP00000379721,9606.ENSP00000388107,9606.ENSP00000441543,9606.ENSP00000485627	TSG101,VPS37B,FAM21A,UBAP1,UBB,VPS37A,VPS37D,MVB12A,HGS,FAM21C,VPS28,ZFYVE27,USP8,UBA52,UBC,WASH1
GO:0000813	ESCRT I complex	7	10	2.59	3.26e-14	9606.ENSP00000251968,9606.ENSP00000267202,9606.ENSP00000297661,9606.ENSP00000318629,9606.ENSP00000320416,9606.ENSP00000324810,9606.ENSP00000366565	TSG101,VPS37B,UBAP1,VPS37A,VPS37D,MVB12A,VPS28
GO:0036452	ESCRT complex	8	27	2.22	4.15e-14	9606.ENSP00000251968,9606.ENSP00000267202,9606.ENSP00000297661,9606.ENSP00000318629,9606.ENSP00000320416,9606.ENSP00000324810,9606.ENSP00000331201,9606.ENSP00000366565	TSG101,VPS37B,UBAP1,VPS37A,VPS37D,MVB12A,HGS,VPS28
GO:0071203	WASH complex	6	11	2.48	8.41e-12	9606.ENSP00000240079,9606.ENSP00000282633,9606.ENSP00000318016,9606.ENSP00000363482,9606.ENSP00000484713,9606.ENSP00000485627	CCDC53,FAM21A,KIAA0196,FAM21C,KIAA1033,WASH1
GO:0005769	early endosome	12	341	1.29	1.55e-11	9606.ENSP00000240079,9606.ENSP00000251968,9606.ENSP00000282633,9606.ENSP00000318016,9606.ENSP00000331201,9606.ENSP00000337452,9606.ENSP00000363482,9606.ENSP00000366565,9606.ENSP00000373620,9606.ENSP00000379721,9606.ENSP00000484713,9606.ENSP00000485627	CCDC53,TSG101,FAM21A,KIAA0196,HGS,NIPA1,FAM21C,VPS28,HSPD1,USP8,KIAA1033,WASH1
GO:0012505	endomembrane system	28	4347	0.56	1.55e-11	9606.ENSP00000240079,9606.ENSP00000245923,9606.ENSP00000251968,9606.ENSP00000267202,9606.ENSP00000282633,9606.ENSP00000297661,9606.ENSP00000304697,9606.ENSP00000310721,9606.ENSP00000318016,9606.ENSP00000318629,9606.ENSP00000320416,9606.ENSP00000324810,9606.ENSP00000331201,9606.ENSP00000337452,9606.ENSP00000342755,9606.ENSP00000351155,9606.ENSP00000363482,9606.ENSP00000366565,9606.ENSP00000373620,…	CCDC53,RTN2,TSG101,VPS37B,FAM21A,UBAP1,UBB,CYP7B1,KIAA0196,VPS37A,VPS37D,MVB12A,HGS,NIPA1,RNF41,ATL1,FAM21C,VPS28,HSPD1,SLC33A1,ZFYVE27,USP8,UBA52,REEP1,UBC,SPAST,KIAA1033,WASH1
GO:0031090	organelle membrane	25	3337	0.62	3.12e-11	9606.ENSP00000245923,9606.ENSP00000251968,9606.ENSP00000264954,9606.ENSP00000267202,9606.ENSP00000270538,9606.ENSP00000282633,9606.ENSP00000297661,9606.ENSP00000304697,9606.ENSP00000310721,9606.ENSP00000318629,9606.ENSP00000320416,9606.ENSP00000324810,9606.ENSP00000331201,9606.ENSP00000351155,9606.ENSP00000363482,9606.ENSP00000366565,9606.ENSP00000373620,9606.ENSP00000376587,9606.ENSP00000377282,…	RTN2,TSG101,GRPEL1,VPS37B,TIMM44,FAM21A,UBAP1,UBB,CYP7B1,VPS37A,VPS37D,MVB12A,HGS,ATL1,FAM21C,VPS28,HSPD1,SLC33A1,ZFYVE27,USP8,UBA52,REEP1,UBC,SPAST,WASH1
GO:0098588	bounding membrane of organelle	18	1950	0.71	1.18e-08	9606.ENSP00000251968,9606.ENSP00000267202,9606.ENSP00000282633,9606.ENSP00000297661,9606.ENSP00000304697,9606.ENSP00000318629,9606.ENSP00000320416,9606.ENSP00000324810,9606.ENSP00000331201,9606.ENSP00000351155,9606.ENSP00000363482,9606.ENSP00000366565,9606.ENSP00000376587,9606.ENSP00000377282,9606.ENSP00000379721,9606.ENSP00000388107,9606.ENSP00000441543,9606.ENSP00000485627	TSG101,VPS37B,FAM21A,UBAP1,UBB,VPS37A,VPS37D,MVB12A,HGS,ATL1,FAM21C,VPS28,SLC33A1,ZFYVE27,USP8,UBA52,UBC,WASH1
GO:0071782	endoplasmic reticulum tubular network	5	22	2.1	1.36e-08	9606.ENSP00000342755,9606.ENSP00000351155,9606.ENSP00000377282,9606.ENSP00000438346,9606.ENSP00000480893	RNF41,ATL1,ZFYVE27,REEP1,SPAST
GO:0031902	late endosome membrane	7	125	1.5	3.42e-08	9606.ENSP00000251968,9606.ENSP00000267202,9606.ENSP00000318629,9606.ENSP00000320416,9606.ENSP00000324810,9606.ENSP00000331201,9606.ENSP00000366565	TSG101,VPS37B,VPS37A,VPS37D,MVB12A,HGS,VPS28
GO:0005737	cytoplasm	35	11238	0.24	3.99e-08	9606.ENSP00000233893,9606.ENSP00000240079,9606.ENSP00000245923,9606.ENSP00000251968,9606.ENSP00000264954,9606.ENSP00000265069,9606.ENSP00000267202,9606.ENSP00000270538,9606.ENSP00000282633,9606.ENSP00000297185,9606.ENSP00000297562,9606.ENSP00000297661,9606.ENSP00000304697,9606.ENSP00000310721,9606.ENSP00000318016,9606.ENSP00000318629,9606.ENSP00000320416,9606.ENSP00000324810,9606.ENSP00000327104,…	HSPE1,CCDC53,RTN2,TSG101,GRPEL1,ZFR,VPS37B,TIMM44,FAM21A,HSPA9,AP5Z1,UBAP1,UBB,CYP7B1,KIAA0196,VPS37A,VPS37D,MVB12A,DDHD1,HGS,NIPA1,RNF41,ATL1,FAM21C,VPS28,HSPD1,SLC33A1,ZFYVE27,USP8,UBA52,REEP1,UBC,SPAST,KIAA1033,WASH1
GO:0005770	late endosome	8	234	1.28	8.34e-08	9606.ENSP00000251968,9606.ENSP00000267202,9606.ENSP00000318629,9606.ENSP00000320416,9606.ENSP00000324810,9606.ENSP00000331201,9606.ENSP00000366565,9606.ENSP00000485627	TSG101,VPS37B,VPS37A,VPS37D,MVB12A,HGS,VPS28,WASH1
GO:0043227	membrane-bounded organelle	34	11244	0.23	9.68e-07	9606.ENSP00000233893,9606.ENSP00000240079,9606.ENSP00000245923,9606.ENSP00000251968,9606.ENSP00000264954,9606.ENSP00000265069,9606.ENSP00000267202,9606.ENSP00000270538,9606.ENSP00000282633,9606.ENSP00000297185,9606.ENSP00000297562,9606.ENSP00000297661,9606.ENSP00000304697,9606.ENSP00000310721,9606.ENSP00000318016,9606.ENSP00000318629,9606.ENSP00000320416,9606.ENSP00000324810,9606.ENSP00000331201,…	HSPE1,CCDC53,RTN2,TSG101,GRPEL1,ZFR,VPS37B,TIMM44,FAM21A,HSPA9,AP5Z1,UBAP1,UBB,CYP7B1,KIAA0196,VPS37A,VPS37D,MVB12A,HGS,NIPA1,RNF41,ATL1,FAM21C,VPS28,HSPD1,SLC33A1,ZFYVE27,USP8,UBA52,REEP1,UBC,SPAST,KIAA1033,WASH1
GO:0098827	endoplasmic reticulum subcompartment	11	1025	0.78	9.68e-06	9606.ENSP00000245923,9606.ENSP00000304697,9606.ENSP00000310721,9606.ENSP00000342755,9606.ENSP00000351155,9606.ENSP00000376587,9606.ENSP00000377282,9606.ENSP00000388107,9606.ENSP00000438346,9606.ENSP00000441543,9606.ENSP00000480893	RTN2,UBB,CYP7B1,RNF41,ATL1,SLC33A1,ZFYVE27,UBA52,REEP1,UBC,SPAST
GO:0043229	intracellular organelle	34	12193	0.19	1.22e-05	9606.ENSP00000233893,9606.ENSP00000240079,9606.ENSP00000245923,9606.ENSP00000251968,9606.ENSP00000264954,9606.ENSP00000265069,9606.ENSP00000267202,9606.ENSP00000270538,9606.ENSP00000282633,9606.ENSP00000297185,9606.ENSP00000297562,9606.ENSP00000297661,9606.ENSP00000304697,9606.ENSP00000310721,9606.ENSP00000318016,9606.ENSP00000318629,9606.ENSP00000320416,9606.ENSP00000324810,9606.ENSP00000331201,…	HSPE1,CCDC53,RTN2,TSG101,GRPEL1,ZFR,VPS37B,TIMM44,FAM21A,HSPA9,AP5Z1,UBAP1,UBB,CYP7B1,KIAA0196,VPS37A,VPS37D,MVB12A,HGS,NIPA1,RNF41,ATL1,FAM21C,VPS28,HSPD1,SLC33A1,ZFYVE27,USP8,UBA52,REEP1,UBC,SPAST,KIAA1033,WASH1
GO:0031901	early endosome membrane	5	143	1.29	4.71e-05	9606.ENSP00000251968,9606.ENSP00000282633,9606.ENSP00000331201,9606.ENSP00000363482,9606.ENSP00000485627	TSG101,FAM21A,HGS,FAM21C,WASH1
GO:0005789	endoplasmic reticulum membrane	10	1022	0.74	6.25e-05	9606.ENSP00000245923,9606.ENSP00000304697,9606.ENSP00000310721,9606.ENSP00000351155,9606.ENSP00000376587,9606.ENSP00000377282,9606.ENSP00000388107,9606.ENSP00000438346,9606.ENSP00000441543,9606.ENSP00000480893	RTN2,UBB,CYP7B1,ATL1,SLC33A1,ZFYVE27,UBA52,REEP1,UBC,SPAST
GO:0098796	membrane protein complex	10	1047	0.73	7.15e-05	9606.ENSP00000251968,9606.ENSP00000264954,9606.ENSP00000267202,9606.ENSP00000297562,9606.ENSP00000297661,9606.ENSP00000318629,9606.ENSP00000320416,9606.ENSP00000324810,9606.ENSP00000366565,9606.ENSP00000373620	TSG101,GRPEL1,VPS37B,AP5Z1,UBAP1,VPS37A,VPS37D,MVB12A,VPS28,HSPD1
GO:0043657	host cell	3	29	1.76	0.00015	9606.ENSP00000304697,9606.ENSP00000388107,9606.ENSP00000441543	UBB,UBA52,UBC
GO:0005783	endoplasmic reticulum	12	1796	0.57	0.00023	9606.ENSP00000245923,9606.ENSP00000304697,9606.ENSP00000310721,9606.ENSP00000318016,9606.ENSP00000342755,9606.ENSP00000351155,9606.ENSP00000376587,9606.ENSP00000377282,9606.ENSP00000388107,9606.ENSP00000438346,9606.ENSP00000441543,9606.ENSP00000480893	RTN2,UBB,CYP7B1,KIAA0196,RNF41,ATL1,SLC33A1,ZFYVE27,UBA52,REEP1,UBC,SPAST
GO:0016020	membrane	27	8420	0.25	0.00024	9606.ENSP00000245923,9606.ENSP00000251968,9606.ENSP00000264954,9606.ENSP00000267202,9606.ENSP00000270538,9606.ENSP00000282633,9606.ENSP00000297562,9606.ENSP00000297661,9606.ENSP00000304697,9606.ENSP00000310721,9606.ENSP00000318629,9606.ENSP00000320416,9606.ENSP00000324810,9606.ENSP00000331201,9606.ENSP00000337452,9606.ENSP00000351155,9606.ENSP00000363482,9606.ENSP00000366565,9606.ENSP00000373620,…	RTN2,TSG101,GRPEL1,VPS37B,TIMM44,FAM21A,AP5Z1,UBAP1,UBB,CYP7B1,VPS37A,VPS37D,MVB12A,HGS,NIPA1,ATL1,FAM21C,VPS28,HSPD1,SLC33A1,ZFYVE27,USP8,UBA52,REEP1,UBC,SPAST,WASH1
GO:0044215	other organism	3	36	1.67	0.00025	9606.ENSP00000304697,9606.ENSP00000388107,9606.ENSP00000441543	UBB,UBA52,UBC
GO:0044216	other organism cell	3	36	1.67	0.00025	9606.ENSP00000304697,9606.ENSP00000388107,9606.ENSP00000441543	UBB,UBA52,UBC
GO:0031966	mitochondrial membrane	7	679	0.76	0.00085	9606.ENSP00000264954,9606.ENSP00000270538,9606.ENSP00000304697,9606.ENSP00000373620,9606.ENSP00000388107,9606.ENSP00000438346,9606.ENSP00000441543	GRPEL1,TIMM44,UBB,HSPD1,UBA52,REEP1,UBC
GO:0030496	midbody	4	165	1.13	0.001	9606.ENSP00000251968,9606.ENSP00000267202,9606.ENSP00000379721,9606.ENSP00000480893	TSG101,VPS37B,USP8,SPAST
GO:0043231	intracellular membrane-bounded organelle	29	10365	0.19	0.001	9606.ENSP00000233893,9606.ENSP00000245923,9606.ENSP00000251968,9606.ENSP00000264954,9606.ENSP00000265069,9606.ENSP00000270538,9606.ENSP00000282633,9606.ENSP00000297185,9606.ENSP00000297562,9606.ENSP00000297661,9606.ENSP00000304697,9606.ENSP00000310721,9606.ENSP00000318016,9606.ENSP00000318629,9606.ENSP00000324810,9606.ENSP00000331201,9606.ENSP00000342755,9606.ENSP00000351155,9606.ENSP00000363482,…	HSPE1,RTN2,TSG101,GRPEL1,ZFR,TIMM44,FAM21A,HSPA9,AP5Z1,UBAP1,UBB,CYP7B1,KIAA0196,VPS37A,MVB12A,HGS,RNF41,ATL1,FAM21C,HSPD1,SLC33A1,ZFYVE27,USP8,UBA52,REEP1,UBC,SPAST,KIAA1033,WASH1
GO:0005829	cytosol	19	4958	0.33	0.0011	9606.ENSP00000251968,9606.ENSP00000282633,9606.ENSP00000297661,9606.ENSP00000304697,9606.ENSP00000318016,9606.ENSP00000318629,9606.ENSP00000324810,9606.ENSP00000327104,9606.ENSP00000331201,9606.ENSP00000342755,9606.ENSP00000363482,9606.ENSP00000366565,9606.ENSP00000373620,9606.ENSP00000377282,9606.ENSP00000379721,9606.ENSP00000388107,9606.ENSP00000441543,9606.ENSP00000480893,9606.ENSP00000485627	TSG101,FAM21A,UBAP1,UBB,KIAA0196,VPS37A,MVB12A,DDHD1,HGS,RNF41,FAM21C,VPS28,HSPD1,ZFYVE27,USP8,UBA52,UBC,SPAST,WASH1
GO:0032991	protein-containing complex	18	4792	0.32	0.0023	9606.ENSP00000240079,9606.ENSP00000251968,9606.ENSP00000264954,9606.ENSP00000267202,9606.ENSP00000282633,9606.ENSP00000297562,9606.ENSP00000297661,9606.ENSP00000318016,9606.ENSP00000318629,9606.ENSP00000320416,9606.ENSP00000324810,9606.ENSP00000331201,9606.ENSP00000363482,9606.ENSP00000366565,9606.ENSP00000373620,9606.ENSP00000388107,9606.ENSP00000484713,9606.ENSP00000485627	CCDC53,TSG101,GRPEL1,VPS37B,FAM21A,AP5Z1,UBAP1,KIAA0196,VPS37A,VPS37D,MVB12A,HGS,FAM21C,VPS28,HSPD1,UBA52,KIAA1033,WASH1
GO:0031967	organelle envelope	8	1146	0.59	0.0032	9606.ENSP00000264954,9606.ENSP00000270538,9606.ENSP00000304697,9606.ENSP00000373620,9606.ENSP00000388107,9606.ENSP00000438346,9606.ENSP00000441543,9606.ENSP00000480893	GRPEL1,TIMM44,UBB,HSPD1,UBA52,REEP1,UBC,SPAST
GO:0005739	mitochondrion	9	1531	0.52	0.0047	9606.ENSP00000233893,9606.ENSP00000264954,9606.ENSP00000270538,9606.ENSP00000297185,9606.ENSP00000304697,9606.ENSP00000373620,9606.ENSP00000388107,9606.ENSP00000438346,9606.ENSP00000441543	HSPE1,GRPEL1,TIMM44,HSPA9,UBB,HSPD1,UBA52,REEP1,UBC
GO:0005759	mitochondrial matrix	5	463	0.78	0.0052	9606.ENSP00000233893,9606.ENSP00000264954,9606.ENSP00000270538,9606.ENSP00000297185,9606.ENSP00000373620	HSPE1,GRPEL1,TIMM44,HSPA9,HSPD1
GO:0070013	intracellular organelle lumen	18	5162	0.29	0.0052	9606.ENSP00000233893,9606.ENSP00000251968,9606.ENSP00000264954,9606.ENSP00000270538,9606.ENSP00000282633,9606.ENSP00000297185,9606.ENSP00000297562,9606.ENSP00000304697,9606.ENSP00000318016,9606.ENSP00000318629,9606.ENSP00000324810,9606.ENSP00000363482,9606.ENSP00000373620,9606.ENSP00000377282,9606.ENSP00000388107,9606.ENSP00000441543,9606.ENSP00000480893,9606.ENSP00000484713	HSPE1,TSG101,GRPEL1,TIMM44,FAM21A,HSPA9,AP5Z1,UBB,KIAA0196,VPS37A,MVB12A,FAM21C,HSPD1,ZFYVE27,UBA52,UBC,SPAST,KIAA1033
GO:0005623	cell	35	16271	0.08	0.0055	9606.ENSP00000233893,9606.ENSP00000240079,9606.ENSP00000245923,9606.ENSP00000251968,9606.ENSP00000264954,9606.ENSP00000265069,9606.ENSP00000267202,9606.ENSP00000270538,9606.ENSP00000282633,9606.ENSP00000297185,9606.ENSP00000297562,9606.ENSP00000297661,9606.ENSP00000304697,9606.ENSP00000310721,9606.ENSP00000318016,9606.ENSP00000318629,9606.ENSP00000320416,9606.ENSP00000324810,9606.ENSP00000327104,…	HSPE1,CCDC53,RTN2,TSG101,GRPEL1,ZFR,VPS37B,TIMM44,FAM21A,HSPA9,AP5Z1,UBAP1,UBB,CYP7B1,KIAA0196,VPS37A,VPS37D,MVB12A,DDHD1,HGS,NIPA1,RNF41,ATL1,FAM21C,VPS28,HSPD1,SLC33A1,ZFYVE27,USP8,UBA52,REEP1,UBC,SPAST,KIAA1033,WASH1
GO:0005771	multivesicular body	2	39	1.46	0.0083	9606.ENSP00000251968,9606.ENSP00000331201	TSG101,HGS
GO:0030666	endocytic vesicle membrane	3	152	1.04	0.0088	9606.ENSP00000304697,9606.ENSP00000388107,9606.ENSP00000441543	UBB,UBA52,UBC
GO:0005741	mitochondrial outer membrane	3	181	0.97	0.014	9606.ENSP00000304697,9606.ENSP00000388107,9606.ENSP00000441543	UBB,UBA52,UBC
GO:0031981	nuclear lumen	14	4030	0.29	0.0215	9606.ENSP00000251968,9606.ENSP00000282633,9606.ENSP00000297185,9606.ENSP00000297562,9606.ENSP00000304697,9606.ENSP00000318016,9606.ENSP00000318629,9606.ENSP00000324810,9606.ENSP00000363482,9606.ENSP00000377282,9606.ENSP00000388107,9606.ENSP00000441543,9606.ENSP00000480893,9606.ENSP00000484713	TSG101,FAM21A,HSPA9,AP5Z1,UBB,KIAA0196,VPS37A,MVB12A,FAM21C,ZFYVE27,UBA52,UBC,SPAST,KIAA1033
GO:0005815	microtubule organizing center	5	683	0.61	0.0216	9606.ENSP00000251968,9606.ENSP00000318629,9606.ENSP00000324810,9606.ENSP00000480893,9606.ENSP00000485627	TSG101,VPS37A,MVB12A,SPAST,WASH1
GO:0055038	recycling endosome membrane	2	74	1.18	0.0242	9606.ENSP00000377282,9606.ENSP00000485627	ZFYVE27,WASH1
GO:0070062	extracellular exosome	2	80	1.15	0.0276	9606.ENSP00000251968,9606.ENSP00000373620	TSG101,HSPD1
GO:0043005	neuron projection	6	1142	0.47	0.0411	9606.ENSP00000304697,9606.ENSP00000318016,9606.ENSP00000351155,9606.ENSP00000377282,9606.ENSP00000379721,9606.ENSP00000480893	UBB,KIAA0196,ATL1,ZFYVE27,USP8,SPAST

## Sheet: 15 indirect enrichment.Process
#term ID	term description	observed gene count	background gene count	strength	false discovery rate	matching proteins in your network (IDs)	matching proteins in your network (labels)
GO:0016197	endosomal transport	17	185	1.71	3.41e-22	9606.ENSP00000251968,9606.ENSP00000267202,9606.ENSP00000282633,9606.ENSP00000297562,9606.ENSP00000297661,9606.ENSP00000304697,9606.ENSP00000318016,9606.ENSP00000318629,9606.ENSP00000320416,9606.ENSP00000324810,9606.ENSP00000331201,9606.ENSP00000363482,9606.ENSP00000366565,9606.ENSP00000388107,9606.ENSP00000441543,9606.ENSP00000484713,9606.ENSP00000485627	TSG101,VPS37B,FAM21A,AP5Z1,UBAP1,UBB,KIAA0196,VPS37A,VPS37D,MVB12A,HGS,FAM21C,VPS28,UBA52,UBC,KIAA1033,WASH1
GO:0042886	amide transport	24	1440	0.97	7.47e-17	9606.ENSP00000240079,9606.ENSP00000245923,9606.ENSP00000251968,9606.ENSP00000264954,9606.ENSP00000267202,9606.ENSP00000270538,9606.ENSP00000282633,9606.ENSP00000297185,9606.ENSP00000297562,9606.ENSP00000297661,9606.ENSP00000304697,9606.ENSP00000318016,9606.ENSP00000318629,9606.ENSP00000320416,9606.ENSP00000324810,9606.ENSP00000331201,9606.ENSP00000363482,9606.ENSP00000366565,9606.ENSP00000373620,…	CCDC53,RTN2,TSG101,GRPEL1,VPS37B,TIMM44,FAM21A,HSPA9,AP5Z1,UBAP1,UBB,KIAA0196,VPS37A,VPS37D,MVB12A,HGS,FAM21C,VPS28,HSPD1,SLC33A1,UBA52,UBC,KIAA1033,WASH1
GO:0045184	establishment of protein localization	24	1467	0.96	7.63e-17	9606.ENSP00000240079,9606.ENSP00000245923,9606.ENSP00000251968,9606.ENSP00000264954,9606.ENSP00000267202,9606.ENSP00000270538,9606.ENSP00000282633,9606.ENSP00000297185,9606.ENSP00000297562,9606.ENSP00000297661,9606.ENSP00000304697,9606.ENSP00000318016,9606.ENSP00000318629,9606.ENSP00000320416,9606.ENSP00000324810,9606.ENSP00000331201,9606.ENSP00000363482,9606.ENSP00000366565,9606.ENSP00000373620,…	CCDC53,RTN2,TSG101,GRPEL1,VPS37B,TIMM44,FAM21A,HSPA9,AP5Z1,UBAP1,UBB,KIAA0196,VPS37A,VPS37D,MVB12A,HGS,FAM21C,VPS28,HSPD1,UBA52,REEP1,UBC,KIAA1033,WASH1
GO:0015031	protein transport	23	1391	0.97	4.29e-16	9606.ENSP00000240079,9606.ENSP00000245923,9606.ENSP00000251968,9606.ENSP00000264954,9606.ENSP00000267202,9606.ENSP00000270538,9606.ENSP00000282633,9606.ENSP00000297185,9606.ENSP00000297562,9606.ENSP00000297661,9606.ENSP00000304697,9606.ENSP00000318016,9606.ENSP00000318629,9606.ENSP00000320416,9606.ENSP00000324810,9606.ENSP00000331201,9606.ENSP00000363482,9606.ENSP00000366565,9606.ENSP00000373620,…	CCDC53,RTN2,TSG101,GRPEL1,VPS37B,TIMM44,FAM21A,HSPA9,AP5Z1,UBAP1,UBB,KIAA0196,VPS37A,VPS37D,MVB12A,HGS,FAM21C,VPS28,HSPD1,UBA52,UBC,KIAA1033,WASH1
GO:0046907	intracellular transport	23	1390	0.97	4.29e-16	9606.ENSP00000245923,9606.ENSP00000251968,9606.ENSP00000264954,9606.ENSP00000267202,9606.ENSP00000270538,9606.ENSP00000282633,9606.ENSP00000297185,9606.ENSP00000297562,9606.ENSP00000297661,9606.ENSP00000304697,9606.ENSP00000318016,9606.ENSP00000318629,9606.ENSP00000320416,9606.ENSP00000324810,9606.ENSP00000331201,9606.ENSP00000363482,9606.ENSP00000366565,9606.ENSP00000373620,9606.ENSP00000388107,…	RTN2,TSG101,GRPEL1,VPS37B,TIMM44,FAM21A,HSPA9,AP5Z1,UBAP1,UBB,KIAA0196,VPS37A,VPS37D,MVB12A,HGS,FAM21C,VPS28,HSPD1,UBA52,UBC,SPAST,KIAA1033,WASH1
GO:0008104	protein localization	25	1966	0.85	1.13e-15	9606.ENSP00000240079,9606.ENSP00000245923,9606.ENSP00000251968,9606.ENSP00000264954,9606.ENSP00000267202,9606.ENSP00000270538,9606.ENSP00000282633,9606.ENSP00000297185,9606.ENSP00000297562,9606.ENSP00000297661,9606.ENSP00000304697,9606.ENSP00000318016,9606.ENSP00000318629,9606.ENSP00000320416,9606.ENSP00000324810,9606.ENSP00000331201,9606.ENSP00000363482,9606.ENSP00000366565,9606.ENSP00000373620,…	CCDC53,RTN2,TSG101,GRPEL1,VPS37B,TIMM44,FAM21A,HSPA9,AP5Z1,UBAP1,UBB,KIAA0196,VPS37A,VPS37D,MVB12A,HGS,FAM21C,VPS28,HSPD1,ZFYVE27,UBA52,REEP1,UBC,KIAA1033,WASH1
GO:0019068	virion assembly	9	37	2.13	6.66e-15	9606.ENSP00000251968,9606.ENSP00000267202,9606.ENSP00000304697,9606.ENSP00000318629,9606.ENSP00000320416,9606.ENSP00000324810,9606.ENSP00000366565,9606.ENSP00000388107,9606.ENSP00000441543	TSG101,VPS37B,UBB,VPS37A,VPS37D,MVB12A,VPS28,UBA52,UBC
GO:0051641	cellular localization	25	2180	0.81	9.51e-15	9606.ENSP00000245923,9606.ENSP00000251968,9606.ENSP00000264954,9606.ENSP00000267202,9606.ENSP00000270538,9606.ENSP00000282633,9606.ENSP00000297185,9606.ENSP00000297562,9606.ENSP00000297661,9606.ENSP00000304697,9606.ENSP00000318016,9606.ENSP00000318629,9606.ENSP00000320416,9606.ENSP00000324810,9606.ENSP00000331201,9606.ENSP00000363482,9606.ENSP00000366565,9606.ENSP00000373620,9606.ENSP00000377282,…	RTN2,TSG101,GRPEL1,VPS37B,TIMM44,FAM21A,HSPA9,AP5Z1,UBAP1,UBB,KIAA0196,VPS37A,VPS37D,MVB12A,HGS,FAM21C,VPS28,HSPD1,ZFYVE27,UBA52,REEP1,UBC,SPAST,KIAA1033,WASH1
GO:0071702	organic substance transport	24	2040	0.82	3.24e-14	9606.ENSP00000240079,9606.ENSP00000245923,9606.ENSP00000251968,9606.ENSP00000264954,9606.ENSP00000267202,9606.ENSP00000270538,9606.ENSP00000282633,9606.ENSP00000297185,9606.ENSP00000297562,9606.ENSP00000297661,9606.ENSP00000304697,9606.ENSP00000318016,9606.ENSP00000318629,9606.ENSP00000320416,9606.ENSP00000324810,9606.ENSP00000331201,9606.ENSP00000363482,9606.ENSP00000366565,9606.ENSP00000373620,…	CCDC53,RTN2,TSG101,GRPEL1,VPS37B,TIMM44,FAM21A,HSPA9,AP5Z1,UBAP1,UBB,KIAA0196,VPS37A,VPS37D,MVB12A,HGS,FAM21C,VPS28,HSPD1,SLC33A1,UBA52,UBC,KIAA1033,WASH1
GO:0007032	endosome organization	9	71	1.85	9.61e-13	9606.ENSP00000251968,9606.ENSP00000267202,9606.ENSP00000318629,9606.ENSP00000320416,9606.ENSP00000324810,9606.ENSP00000331201,9606.ENSP00000366565,9606.ENSP00000379721,9606.ENSP00000484713	TSG101,VPS37B,VPS37A,VPS37D,MVB12A,HGS,VPS28,USP8,KIAA1033
GO:0010256	endomembrane system organization	13	337	1.33	1.09e-12	9606.ENSP00000251968,9606.ENSP00000267202,9606.ENSP00000318629,9606.ENSP00000320416,9606.ENSP00000324810,9606.ENSP00000331201,9606.ENSP00000351155,9606.ENSP00000366565,9606.ENSP00000377282,9606.ENSP00000379721,9606.ENSP00000438346,9606.ENSP00000480893,9606.ENSP00000484713	TSG101,VPS37B,VPS37A,VPS37D,MVB12A,HGS,ATL1,VPS28,ZFYVE27,USP8,REEP1,SPAST,KIAA1033
GO:0019058	viral life cycle	10	166	1.53	2.43e-11	9606.ENSP00000251968,9606.ENSP00000267202,9606.ENSP00000297661,9606.ENSP00000304697,9606.ENSP00000318629,9606.ENSP00000320416,9606.ENSP00000324810,9606.ENSP00000366565,9606.ENSP00000388107,9606.ENSP00000441543	TSG101,VPS37B,UBAP1,UBB,VPS37A,VPS37D,MVB12A,VPS28,UBA52,UBC
GO:0036258	multivesicular body assembly	7	31	2.1	2.43e-11	9606.ENSP00000251968,9606.ENSP00000267202,9606.ENSP00000318629,9606.ENSP00000320416,9606.ENSP00000324810,9606.ENSP00000331201,9606.ENSP00000366565	TSG101,VPS37B,VPS37A,VPS37D,MVB12A,HGS,VPS28
GO:0051234	establishment of localization	28	4248	0.57	2.43e-11	9606.ENSP00000240079,9606.ENSP00000245923,9606.ENSP00000251968,9606.ENSP00000264954,9606.ENSP00000267202,9606.ENSP00000270538,9606.ENSP00000282633,9606.ENSP00000297185,9606.ENSP00000297562,9606.ENSP00000297661,9606.ENSP00000304697,9606.ENSP00000318016,9606.ENSP00000318629,9606.ENSP00000320416,9606.ENSP00000324810,9606.ENSP00000331201,9606.ENSP00000337452,9606.ENSP00000363482,9606.ENSP00000366565,…	CCDC53,RTN2,TSG101,GRPEL1,VPS37B,TIMM44,FAM21A,HSPA9,AP5Z1,UBAP1,UBB,KIAA0196,VPS37A,VPS37D,MVB12A,HGS,NIPA1,FAM21C,VPS28,HSPD1,SLC33A1,ZFYVE27,UBA52,REEP1,UBC,SPAST,KIAA1033,WASH1
GO:0006810	transport	27	4130	0.56	1.23e-10	9606.ENSP00000240079,9606.ENSP00000245923,9606.ENSP00000251968,9606.ENSP00000264954,9606.ENSP00000267202,9606.ENSP00000270538,9606.ENSP00000282633,9606.ENSP00000297185,9606.ENSP00000297562,9606.ENSP00000297661,9606.ENSP00000304697,9606.ENSP00000318016,9606.ENSP00000318629,9606.ENSP00000320416,9606.ENSP00000324810,9606.ENSP00000331201,9606.ENSP00000337452,9606.ENSP00000363482,9606.ENSP00000366565,…	CCDC53,RTN2,TSG101,GRPEL1,VPS37B,TIMM44,FAM21A,HSPA9,AP5Z1,UBAP1,UBB,KIAA0196,VPS37A,VPS37D,MVB12A,HGS,NIPA1,FAM21C,VPS28,HSPD1,SLC33A1,ZFYVE27,UBA52,UBC,SPAST,KIAA1033,WASH1
GO:0039702	viral budding via host ESCRT complex	6	21	2.2	2.97e-10	9606.ENSP00000251968,9606.ENSP00000267202,9606.ENSP00000318629,9606.ENSP00000320416,9606.ENSP00000324810,9606.ENSP00000366565	TSG101,VPS37B,VPS37A,VPS37D,MVB12A,VPS28
GO:0051179	localization	29	5233	0.49	3.34e-10	9606.ENSP00000240079,9606.ENSP00000245923,9606.ENSP00000251968,9606.ENSP00000264954,9606.ENSP00000267202,9606.ENSP00000270538,9606.ENSP00000282633,9606.ENSP00000297185,9606.ENSP00000297562,9606.ENSP00000297661,9606.ENSP00000304697,9606.ENSP00000310721,9606.ENSP00000318016,9606.ENSP00000318629,9606.ENSP00000320416,9606.ENSP00000324810,9606.ENSP00000331201,9606.ENSP00000337452,9606.ENSP00000363482,…	CCDC53,RTN2,TSG101,GRPEL1,VPS37B,TIMM44,FAM21A,HSPA9,AP5Z1,UBAP1,UBB,CYP7B1,KIAA0196,VPS37A,VPS37D,MVB12A,HGS,NIPA1,FAM21C,VPS28,HSPD1,SLC33A1,ZFYVE27,UBA52,REEP1,UBC,SPAST,KIAA1033,WASH1
GO:0016192	vesicle-mediated transport	19	1699	0.8	3.5e-10	9606.ENSP00000251968,9606.ENSP00000267202,9606.ENSP00000282633,9606.ENSP00000297562,9606.ENSP00000297661,9606.ENSP00000304697,9606.ENSP00000318016,9606.ENSP00000318629,9606.ENSP00000320416,9606.ENSP00000324810,9606.ENSP00000331201,9606.ENSP00000363482,9606.ENSP00000366565,9606.ENSP00000377282,9606.ENSP00000388107,9606.ENSP00000441543,9606.ENSP00000480893,9606.ENSP00000484713,9606.ENSP00000485627	TSG101,VPS37B,FAM21A,AP5Z1,UBAP1,UBB,KIAA0196,VPS37A,VPS37D,MVB12A,HGS,FAM21C,VPS28,ZFYVE27,UBA52,UBC,SPAST,KIAA1033,WASH1
GO:0043162	ubiquitin-dependent protein catabolic process via the multivesicular body sorting pathway	5	19	2.17	2.35e-08	9606.ENSP00000251968,9606.ENSP00000297661,9606.ENSP00000318629,9606.ENSP00000324810,9606.ENSP00000366565	TSG101,UBAP1,VPS37A,MVB12A,VPS28
GO:0016032	viral process	11	571	1.03	1.27e-07	9606.ENSP00000251968,9606.ENSP00000267202,9606.ENSP00000297661,9606.ENSP00000304697,9606.ENSP00000318629,9606.ENSP00000320416,9606.ENSP00000324810,9606.ENSP00000366565,9606.ENSP00000373620,9606.ENSP00000388107,9606.ENSP00000441543	TSG101,VPS37B,UBAP1,UBB,VPS37A,VPS37D,MVB12A,VPS28,HSPD1,UBA52,UBC
GO:0016236	macroautophagy	7	132	1.47	1.68e-07	9606.ENSP00000251968,9606.ENSP00000267202,9606.ENSP00000318629,9606.ENSP00000320416,9606.ENSP00000324810,9606.ENSP00000331201,9606.ENSP00000366565	TSG101,VPS37B,VPS37A,VPS37D,MVB12A,HGS,VPS28
GO:0006996	organelle organization	21	3131	0.57	1.69e-07	9606.ENSP00000251968,9606.ENSP00000264954,9606.ENSP00000267202,9606.ENSP00000270538,9606.ENSP00000304697,9606.ENSP00000318016,9606.ENSP00000318629,9606.ENSP00000320416,9606.ENSP00000324810,9606.ENSP00000331201,9606.ENSP00000351155,9606.ENSP00000366565,9606.ENSP00000373620,9606.ENSP00000377282,9606.ENSP00000379721,9606.ENSP00000388107,9606.ENSP00000438346,9606.ENSP00000441543,9606.ENSP00000480893,…	TSG101,GRPEL1,VPS37B,TIMM44,UBB,KIAA0196,VPS37A,VPS37D,MVB12A,HGS,ATL1,VPS28,HSPD1,ZFYVE27,USP8,UBA52,REEP1,UBC,SPAST,KIAA1033,WASH1
GO:0006914	autophagy	8	240	1.27	3.6e-07	9606.ENSP00000251968,9606.ENSP00000267202,9606.ENSP00000318629,9606.ENSP00000320416,9606.ENSP00000324810,9606.ENSP00000331201,9606.ENSP00000342755,9606.ENSP00000366565	TSG101,VPS37B,VPS37A,VPS37D,MVB12A,HGS,RNF41,VPS28
GO:0051603	proteolysis involved in cellular protein catabolic process	10	532	1.02	7.55e-07	9606.ENSP00000251968,9606.ENSP00000297661,9606.ENSP00000304697,9606.ENSP00000318629,9606.ENSP00000324810,9606.ENSP00000342755,9606.ENSP00000366565,9606.ENSP00000379721,9606.ENSP00000388107,9606.ENSP00000441543	TSG101,UBAP1,UBB,VPS37A,MVB12A,RNF41,VPS28,USP8,UBA52,UBC
GO:0032509	endosome transport via multivesicular body sorting pathway	4	20	2.05	2.58e-06	9606.ENSP00000267202,9606.ENSP00000318629,9606.ENSP00000320416,9606.ENSP00000366565	VPS37B,VPS37A,VPS37D,VPS28
GO:0006511	ubiquitin-dependent protein catabolic process	9	461	1.04	2.72e-06	9606.ENSP00000251968,9606.ENSP00000297661,9606.ENSP00000304697,9606.ENSP00000318629,9606.ENSP00000324810,9606.ENSP00000366565,9606.ENSP00000379721,9606.ENSP00000388107,9606.ENSP00000441543	TSG101,UBAP1,UBB,VPS37A,MVB12A,VPS28,USP8,UBA52,UBC
GO:1903772	regulation of viral budding via host ESCRT complex	3	5	2.53	7.44e-06	9606.ENSP00000251968,9606.ENSP00000267202,9606.ENSP00000324810	TSG101,VPS37B,MVB12A
GO:0072594	establishment of protein localization to organelle	8	396	1.05	1.07e-05	9606.ENSP00000264954,9606.ENSP00000270538,9606.ENSP00000304697,9606.ENSP00000331201,9606.ENSP00000366565,9606.ENSP00000373620,9606.ENSP00000388107,9606.ENSP00000441543	GRPEL1,TIMM44,UBB,HGS,VPS28,HSPD1,UBA52,UBC
GO:0002755	MyD88-dependent toll-like receptor signaling pathway	4	33	1.83	1.29e-05	9606.ENSP00000304697,9606.ENSP00000373620,9606.ENSP00000388107,9606.ENSP00000441543	UBB,HSPD1,UBA52,UBC
GO:0022607	cellular component assembly	16	2343	0.58	1.83e-05	9606.ENSP00000251968,9606.ENSP00000267202,9606.ENSP00000297185,9606.ENSP00000304697,9606.ENSP00000318016,9606.ENSP00000318629,9606.ENSP00000320416,9606.ENSP00000324810,9606.ENSP00000331201,9606.ENSP00000351155,9606.ENSP00000366565,9606.ENSP00000373620,9606.ENSP00000377282,9606.ENSP00000388107,9606.ENSP00000441543,9606.ENSP00000480893	TSG101,VPS37B,HSPA9,UBB,KIAA0196,VPS37A,VPS37D,MVB12A,HGS,ATL1,VPS28,HSPD1,ZFYVE27,UBA52,UBC,SPAST
GO:0016043	cellular component organization	23	5163	0.4	2.96e-05	9606.ENSP00000251968,9606.ENSP00000264954,9606.ENSP00000267202,9606.ENSP00000270538,9606.ENSP00000297185,9606.ENSP00000304697,9606.ENSP00000318016,9606.ENSP00000318629,9606.ENSP00000320416,9606.ENSP00000324810,9606.ENSP00000331201,9606.ENSP00000351155,9606.ENSP00000363482,9606.ENSP00000366565,9606.ENSP00000373620,9606.ENSP00000377282,9606.ENSP00000379721,9606.ENSP00000388107,9606.ENSP00000438346,…	TSG101,GRPEL1,VPS37B,TIMM44,HSPA9,UBB,KIAA0196,VPS37A,VPS37D,MVB12A,HGS,ATL1,FAM21C,VPS28,HSPD1,ZFYVE27,USP8,UBA52,REEP1,UBC,SPAST,KIAA1033,WASH1
GO:0006605	protein targeting	7	318	1.09	3.26e-05	9606.ENSP00000264954,9606.ENSP00000270538,9606.ENSP00000304697,9606.ENSP00000331201,9606.ENSP00000373620,9606.ENSP00000388107,9606.ENSP00000441543	GRPEL1,TIMM44,UBB,HGS,HSPD1,UBA52,UBC
GO:0006886	intracellular protein transport	10	836	0.83	3.26e-05	9606.ENSP00000245923,9606.ENSP00000264954,9606.ENSP00000270538,9606.ENSP00000297185,9606.ENSP00000304697,9606.ENSP00000331201,9606.ENSP00000366565,9606.ENSP00000373620,9606.ENSP00000388107,9606.ENSP00000441543	RTN2,GRPEL1,TIMM44,HSPA9,UBB,HGS,VPS28,HSPD1,UBA52,UBC
GO:0009056	catabolic process	14	1859	0.62	3.55e-05	9606.ENSP00000251968,9606.ENSP00000267202,9606.ENSP00000297661,9606.ENSP00000304697,9606.ENSP00000318629,9606.ENSP00000320416,9606.ENSP00000324810,9606.ENSP00000327104,9606.ENSP00000331201,9606.ENSP00000342755,9606.ENSP00000366565,9606.ENSP00000379721,9606.ENSP00000388107,9606.ENSP00000441543	TSG101,VPS37B,UBAP1,UBB,VPS37A,VPS37D,MVB12A,DDHD1,HGS,RNF41,VPS28,USP8,UBA52,UBC
GO:0065002	intracellular protein transmembrane transport	4	49	1.66	4.82e-05	9606.ENSP00000245923,9606.ENSP00000264954,9606.ENSP00000270538,9606.ENSP00000373620	RTN2,GRPEL1,TIMM44,HSPD1
GO:0071786	endoplasmic reticulum tubular network organization	3	12	2.15	4.82e-05	9606.ENSP00000351155,9606.ENSP00000377282,9606.ENSP00000438346	ATL1,ZFYVE27,REEP1
GO:0034613	cellular protein localization	12	1367	0.69	4.92e-05	9606.ENSP00000245923,9606.ENSP00000264954,9606.ENSP00000270538,9606.ENSP00000297185,9606.ENSP00000304697,9606.ENSP00000331201,9606.ENSP00000366565,9606.ENSP00000373620,9606.ENSP00000377282,9606.ENSP00000388107,9606.ENSP00000438346,9606.ENSP00000441543	RTN2,GRPEL1,TIMM44,HSPA9,UBB,HGS,VPS28,HSPD1,ZFYVE27,UBA52,REEP1,UBC
GO:0044248	cellular catabolic process	13	1646	0.64	5.05e-05	9606.ENSP00000251968,9606.ENSP00000267202,9606.ENSP00000297661,9606.ENSP00000304697,9606.ENSP00000318629,9606.ENSP00000320416,9606.ENSP00000324810,9606.ENSP00000331201,9606.ENSP00000342755,9606.ENSP00000366565,9606.ENSP00000379721,9606.ENSP00000388107,9606.ENSP00000441543	TSG101,VPS37B,UBAP1,UBB,VPS37A,VPS37D,MVB12A,HGS,RNF41,VPS28,USP8,UBA52,UBC
GO:0075733	intracellular transport of virus	3	14	2.08	6.32e-05	9606.ENSP00000304697,9606.ENSP00000388107,9606.ENSP00000441543	UBB,UBA52,UBC
GO:0043902	positive regulation of multi-organism process	7	394	1	9.87e-05	9606.ENSP00000251968,9606.ENSP00000267202,9606.ENSP00000304697,9606.ENSP00000324810,9606.ENSP00000373620,9606.ENSP00000388107,9606.ENSP00000441543	TSG101,VPS37B,UBB,MVB12A,HSPD1,UBA52,UBC
GO:0070987	error-free translesion synthesis	3	19	1.95	0.00013	9606.ENSP00000304697,9606.ENSP00000388107,9606.ENSP00000441543	UBB,UBA52,UBC
GO:0042276	error-prone translesion synthesis	3	20	1.92	0.00015	9606.ENSP00000304697,9606.ENSP00000388107,9606.ENSP00000441543	UBB,UBA52,UBC
GO:0000715	nucleotide-excision repair, DNA damage recognition	3	23	1.86	0.00021	9606.ENSP00000304697,9606.ENSP00000388107,9606.ENSP00000441543	UBB,UBA52,UBC
GO:0006297	nucleotide-excision repair, DNA gap filling	3	23	1.86	0.00021	9606.ENSP00000304697,9606.ENSP00000388107,9606.ENSP00000441543	UBB,UBA52,UBC
GO:0035666	TRIF-dependent toll-like receptor signaling pathway	3	24	1.84	0.00023	9606.ENSP00000304697,9606.ENSP00000388107,9606.ENSP00000441543	UBB,UBA52,UBC
GO:0070911	global genome nucleotide-excision repair	3	26	1.81	0.00028	9606.ENSP00000304697,9606.ENSP00000388107,9606.ENSP00000441543	UBB,UBA52,UBC
GO:0070925	organelle assembly	8	666	0.83	0.00028	9606.ENSP00000251968,9606.ENSP00000267202,9606.ENSP00000318016,9606.ENSP00000318629,9606.ENSP00000320416,9606.ENSP00000324810,9606.ENSP00000331201,9606.ENSP00000366565	TSG101,VPS37B,KIAA0196,VPS37A,VPS37D,MVB12A,HGS,VPS28
GO:2000397	positive regulation of ubiquitin-dependent endocytosis	2	2	2.75	0.00028	9606.ENSP00000251968,9606.ENSP00000366565	TSG101,VPS28
GO:0070423	nucleotide-binding oligomerization domain containing signaling pathway	3	27	1.79	0.00029	9606.ENSP00000304697,9606.ENSP00000388107,9606.ENSP00000441543	UBB,UBA52,UBC
GO:0006294	nucleotide-excision repair, preincision complex assembly	3	29	1.76	0.00034	9606.ENSP00000304697,9606.ENSP00000388107,9606.ENSP00000441543	UBB,UBA52,UBC
GO:1903774	positive regulation of viral budding via host ESCRT complex	2	3	2.57	0.0004	9606.ENSP00000251968,9606.ENSP00000267202	TSG101,VPS37B
GO:0061418	regulation of transcription from RNA polymerase II promoter in response to hypoxia	3	32	1.72	0.00042	9606.ENSP00000304697,9606.ENSP00000388107,9606.ENSP00000441543	UBB,UBA52,UBC
GO:0031145	anaphase-promoting complex-dependent catabolic process	3	35	1.68	0.00052	9606.ENSP00000304697,9606.ENSP00000388107,9606.ENSP00000441543	UBB,UBA52,UBC
GO:0006296	nucleotide-excision repair, DNA incision, 5'-to lesion	3	37	1.66	0.0006	9606.ENSP00000304697,9606.ENSP00000388107,9606.ENSP00000441543	UBB,UBA52,UBC
GO:0042769	DNA damage response, detection of DNA damage	3	38	1.64	0.00064	9606.ENSP00000304697,9606.ENSP00000388107,9606.ENSP00000441543	UBB,UBA52,UBC
GO:0044743	protein transmembrane import into intracellular organelle	3	38	1.64	0.00064	9606.ENSP00000264954,9606.ENSP00000270538,9606.ENSP00000373620	GRPEL1,TIMM44,HSPD1
GO:1901575	organic substance catabolic process	11	1609	0.58	0.00087	9606.ENSP00000251968,9606.ENSP00000297661,9606.ENSP00000304697,9606.ENSP00000318629,9606.ENSP00000324810,9606.ENSP00000327104,9606.ENSP00000342755,9606.ENSP00000366565,9606.ENSP00000379721,9606.ENSP00000388107,9606.ENSP00000441543	TSG101,UBAP1,UBB,VPS37A,MVB12A,DDHD1,RNF41,VPS28,USP8,UBA52,UBC
GO:0036297	interstrand cross-link repair	3	49	1.53	0.0012	9606.ENSP00000304697,9606.ENSP00000388107,9606.ENSP00000441543	UBB,UBA52,UBC
GO:0090288	negative regulation of cellular response to growth factor stimulus	4	137	1.21	0.0012	9606.ENSP00000304697,9606.ENSP00000331201,9606.ENSP00000388107,9606.ENSP00000441543	UBB,HGS,UBA52,UBC
GO:0070498	interleukin-1-mediated signaling pathway	3	51	1.52	0.0013	9606.ENSP00000304697,9606.ENSP00000388107,9606.ENSP00000441543	UBB,UBA52,UBC
GO:0006626	protein targeting to mitochondrion	3	58	1.46	0.0018	9606.ENSP00000264954,9606.ENSP00000270538,9606.ENSP00000373620	GRPEL1,TIMM44,HSPD1
GO:0071363	cellular response to growth factor stimulus	6	477	0.85	0.002	9606.ENSP00000304697,9606.ENSP00000376587,9606.ENSP00000377282,9606.ENSP00000379721,9606.ENSP00000388107,9606.ENSP00000441543	UBB,SLC33A1,ZFYVE27,USP8,UBA52,UBC
GO:0061640	cytoskeleton-dependent cytokinesis	3	64	1.42	0.0024	9606.ENSP00000318016,9606.ENSP00000379721,9606.ENSP00000480893	KIAA0196,USP8,SPAST
GO:0002758	innate immune response-activating signal transduction	4	168	1.12	0.0025	9606.ENSP00000304697,9606.ENSP00000373620,9606.ENSP00000388107,9606.ENSP00000441543	UBB,HSPD1,UBA52,UBC
GO:0055085	transmembrane transport	9	1235	0.61	0.0026	9606.ENSP00000245923,9606.ENSP00000264954,9606.ENSP00000270538,9606.ENSP00000304697,9606.ENSP00000337452,9606.ENSP00000373620,9606.ENSP00000376587,9606.ENSP00000388107,9606.ENSP00000441543	RTN2,GRPEL1,TIMM44,UBB,NIPA1,HSPD1,SLC33A1,UBA52,UBC
GO:0006625	protein targeting to peroxisome	3	68	1.39	0.0027	9606.ENSP00000304697,9606.ENSP00000388107,9606.ENSP00000441543	UBB,UBA52,UBC
GO:0061024	membrane organization	7	729	0.73	0.0027	9606.ENSP00000304697,9606.ENSP00000331201,9606.ENSP00000351155,9606.ENSP00000388107,9606.ENSP00000438346,9606.ENSP00000441543,9606.ENSP00000480893	UBB,HGS,ATL1,UBA52,REEP1,UBC,SPAST
GO:0007249	I-kappaB kinase/NF-kappaB signaling	3	70	1.38	0.0028	9606.ENSP00000304697,9606.ENSP00000388107,9606.ENSP00000441543	UBB,UBA52,UBC
GO:0030512	negative regulation of transforming growth factor beta receptor signaling pathway	3	70	1.38	0.0028	9606.ENSP00000304697,9606.ENSP00000388107,9606.ENSP00000441543	UBB,UBA52,UBC
GO:0043405	regulation of MAP kinase activity	5	337	0.92	0.003	9606.ENSP00000251968,9606.ENSP00000304697,9606.ENSP00000331201,9606.ENSP00000388107,9606.ENSP00000441543	TSG101,UBB,HGS,UBA52,UBC
GO:0006283	transcription-coupled nucleotide-excision repair	3	75	1.35	0.0032	9606.ENSP00000304697,9606.ENSP00000388107,9606.ENSP00000441543	UBB,UBA52,UBC
GO:0007178	transmembrane receptor protein serine/threonine kinase signaling pathway	4	189	1.07	0.0032	9606.ENSP00000304697,9606.ENSP00000376587,9606.ENSP00000388107,9606.ENSP00000441543	UBB,SLC33A1,UBA52,UBC
GO:1903543	positive regulation of exosomal secretion	2	14	1.9	0.0032	9606.ENSP00000251968,9606.ENSP00000331201	TSG101,HGS
GO:0042147	retrograde transport, endosome to Golgi	3	79	1.33	0.0035	9606.ENSP00000282633,9606.ENSP00000363482,9606.ENSP00000485627	FAM21A,FAM21C,WASH1
GO:0042058	regulation of epidermal growth factor receptor signaling pathway	3	80	1.32	0.0036	9606.ENSP00000251968,9606.ENSP00000324810,9606.ENSP00000331201	TSG101,MVB12A,HGS
GO:1990542	mitochondrial transmembrane transport	3	83	1.31	0.004	9606.ENSP00000264954,9606.ENSP00000270538,9606.ENSP00000373620	GRPEL1,TIMM44,HSPD1
GO:0007254	JNK cascade	3	85	1.3	0.0042	9606.ENSP00000304697,9606.ENSP00000388107,9606.ENSP00000441543	UBB,UBA52,UBC
GO:0030150	protein import into mitochondrial matrix	2	17	1.82	0.0042	9606.ENSP00000264954,9606.ENSP00000270538	GRPEL1,TIMM44
GO:0048524	positive regulation of viral process	3	85	1.3	0.0042	9606.ENSP00000251968,9606.ENSP00000267202,9606.ENSP00000324810	TSG101,VPS37B,MVB12A
GO:1902188	positive regulation of viral release from host cell	2	17	1.82	0.0042	9606.ENSP00000251968,9606.ENSP00000267202	TSG101,VPS37B
GO:0007179	transforming growth factor beta receptor signaling pathway	3	88	1.28	0.0045	9606.ENSP00000304697,9606.ENSP00000388107,9606.ENSP00000441543	UBB,UBA52,UBC
GO:0047497	mitochondrion transport along microtubule	2	18	1.79	0.0045	9606.ENSP00000304697,9606.ENSP00000480893	UBB,SPAST
GO:0006457	protein folding	4	214	1.02	0.0046	9606.ENSP00000233893,9606.ENSP00000264954,9606.ENSP00000297185,9606.ENSP00000373620	HSPE1,GRPEL1,HSPA9,HSPD1
GO:0009894	regulation of catabolic process	7	840	0.67	0.0049	9606.ENSP00000304697,9606.ENSP00000331201,9606.ENSP00000342755,9606.ENSP00000366565,9606.ENSP00000388107,9606.ENSP00000441543,9606.ENSP00000485627	UBB,HGS,RNF41,VPS28,UBA52,UBC,WASH1
GO:1990126	retrograde transport, endosome to plasma membrane	2	20	1.75	0.0053	9606.ENSP00000363482,9606.ENSP00000485627	FAM21C,WASH1
GO:0000209	protein polyubiquitination	4	240	0.97	0.0067	9606.ENSP00000304697,9606.ENSP00000342755,9606.ENSP00000388107,9606.ENSP00000441543	UBB,RNF41,UBA52,UBC
GO:0048518	positive regulation of biological process	19	5459	0.29	0.0067	9606.ENSP00000233893,9606.ENSP00000251968,9606.ENSP00000267202,9606.ENSP00000304697,9606.ENSP00000310721,9606.ENSP00000318016,9606.ENSP00000324810,9606.ENSP00000327104,9606.ENSP00000331201,9606.ENSP00000342755,9606.ENSP00000363482,9606.ENSP00000366565,9606.ENSP00000373620,9606.ENSP00000377282,9606.ENSP00000379721,9606.ENSP00000388107,9606.ENSP00000441543,9606.ENSP00000480893,9606.ENSP00000485627	HSPE1,TSG101,VPS37B,UBB,CYP7B1,KIAA0196,MVB12A,DDHD1,HGS,RNF41,FAM21C,VPS28,HSPD1,ZFYVE27,USP8,UBA52,UBC,SPAST,WASH1
GO:0051704	multi-organism process	12	2514	0.43	0.007	9606.ENSP00000251968,9606.ENSP00000267202,9606.ENSP00000297661,9606.ENSP00000304697,9606.ENSP00000318016,9606.ENSP00000318629,9606.ENSP00000320416,9606.ENSP00000324810,9606.ENSP00000366565,9606.ENSP00000373620,9606.ENSP00000388107,9606.ENSP00000441543	TSG101,VPS37B,UBAP1,UBB,KIAA0196,VPS37A,VPS37D,MVB12A,VPS28,HSPD1,UBA52,UBC
GO:0051091	positive regulation of DNA-binding transcription factor activity	4	250	0.95	0.0075	9606.ENSP00000304697,9606.ENSP00000342755,9606.ENSP00000388107,9606.ENSP00000441543	UBB,RNF41,UBA52,UBC
GO:0043488	regulation of mRNA stability	3	113	1.17	0.008	9606.ENSP00000304697,9606.ENSP00000388107,9606.ENSP00000441543	UBB,UBA52,UBC
GO:0007034	vacuolar transport	3	115	1.16	0.0083	9606.ENSP00000251968,9606.ENSP00000331201,9606.ENSP00000366565	TSG101,HGS,VPS28
GO:0016579	protein deubiquitination	4	275	0.91	0.01	9606.ENSP00000304697,9606.ENSP00000379721,9606.ENSP00000388107,9606.ENSP00000441543	UBB,USP8,UBA52,UBC
GO:0043408	regulation of MAPK cascade	6	712	0.67	0.0102	9606.ENSP00000251968,9606.ENSP00000304697,9606.ENSP00000331201,9606.ENSP00000342755,9606.ENSP00000388107,9606.ENSP00000441543	TSG101,UBB,HGS,RNF41,UBA52,UBC
GO:0010498	proteasomal protein catabolic process	4	284	0.9	0.011	9606.ENSP00000304697,9606.ENSP00000342755,9606.ENSP00000388107,9606.ENSP00000441543	UBB,RNF41,UBA52,UBC
GO:0072666	establishment of protein localization to vacuole	2	32	1.54	0.011	9606.ENSP00000331201,9606.ENSP00000366565	HGS,VPS28
GO:0051092	positive regulation of NF-kappaB transcription factor activity	3	142	1.07	0.0134	9606.ENSP00000304697,9606.ENSP00000388107,9606.ENSP00000441543	UBB,UBA52,UBC
GO:0048522	positive regulation of cellular process	17	4898	0.29	0.0137	9606.ENSP00000233893,9606.ENSP00000251968,9606.ENSP00000304697,9606.ENSP00000310721,9606.ENSP00000318016,9606.ENSP00000327104,9606.ENSP00000331201,9606.ENSP00000342755,9606.ENSP00000363482,9606.ENSP00000366565,9606.ENSP00000373620,9606.ENSP00000377282,9606.ENSP00000379721,9606.ENSP00000388107,9606.ENSP00000441543,9606.ENSP00000480893,9606.ENSP00000485627	HSPE1,TSG101,UBB,CYP7B1,KIAA0196,DDHD1,HGS,RNF41,FAM21C,VPS28,HSPD1,ZFYVE27,USP8,UBA52,UBC,SPAST,WASH1
GO:0006458	'de novo' protein folding	2	39	1.46	0.0146	9606.ENSP00000233893,9606.ENSP00000373620	HSPE1,HSPD1
GO:0042059	negative regulation of epidermal growth factor receptor signaling pathway	2	39	1.46	0.0146	9606.ENSP00000251968,9606.ENSP00000331201	TSG101,HGS
GO:0000187	activation of MAPK activity	3	149	1.05	0.0147	9606.ENSP00000304697,9606.ENSP00000388107,9606.ENSP00000441543	UBB,UBA52,UBC
GO:0051130	positive regulation of cellular component organization	7	1128	0.54	0.0196	9606.ENSP00000251968,9606.ENSP00000318016,9606.ENSP00000327104,9606.ENSP00000363482,9606.ENSP00000366565,9606.ENSP00000377282,9606.ENSP00000485627	TSG101,KIAA0196,DDHD1,FAM21C,VPS28,ZFYVE27,WASH1
GO:0043549	regulation of kinase activity	6	849	0.6	0.021	9606.ENSP00000251968,9606.ENSP00000304697,9606.ENSP00000331201,9606.ENSP00000388107,9606.ENSP00000441543,9606.ENSP00000485627	TSG101,UBB,HGS,UBA52,UBC,WASH1
GO:0000281	mitotic cytokinesis	2	50	1.35	0.0216	9606.ENSP00000379721,9606.ENSP00000480893	USP8,SPAST
GO:0042176	regulation of protein catabolic process	4	368	0.78	0.0229	9606.ENSP00000304697,9606.ENSP00000331201,9606.ENSP00000342755,9606.ENSP00000366565	UBB,HGS,RNF41,VPS28
GO:0043065	positive regulation of apoptotic process	5	604	0.67	0.0232	9606.ENSP00000233893,9606.ENSP00000304697,9606.ENSP00000373620,9606.ENSP00000388107,9606.ENSP00000441543	HSPE1,UBB,HSPD1,UBA52,UBC
GO:0031396	regulation of protein ubiquitination	3	192	0.94	0.0269	9606.ENSP00000304697,9606.ENSP00000366565,9606.ENSP00000485627	UBB,VPS28,WASH1
GO:0016567	protein ubiquitination	5	645	0.64	0.0297	9606.ENSP00000251968,9606.ENSP00000304697,9606.ENSP00000342755,9606.ENSP00000388107,9606.ENSP00000441543	TSG101,UBB,RNF41,UBA52,UBC
GO:0072657	protein localization to membrane	4	405	0.74	0.0306	9606.ENSP00000331201,9606.ENSP00000377282,9606.ENSP00000388107,9606.ENSP00000438346	HGS,ZFYVE27,UBA52,REEP1
GO:0061077	chaperone-mediated protein folding	2	63	1.25	0.0311	9606.ENSP00000233893,9606.ENSP00000373620	HSPE1,HSPD1
GO:0070647	protein modification by small protein conjugation or removal	6	945	0.55	0.0321	9606.ENSP00000251968,9606.ENSP00000304697,9606.ENSP00000342755,9606.ENSP00000379721,9606.ENSP00000388107,9606.ENSP00000441543	TSG101,UBB,RNF41,USP8,UBA52,UBC
GO:0007167	enzyme linked receptor protein signaling pathway	5	698	0.6	0.0381	9606.ENSP00000304697,9606.ENSP00000376587,9606.ENSP00000377282,9606.ENSP00000388107,9606.ENSP00000441543	UBB,SLC33A1,ZFYVE27,UBA52,UBC
GO:0010507	negative regulation of autophagy	2	73	1.19	0.0385	9606.ENSP00000342755,9606.ENSP00000485627	RNF41,WASH1
GO:0030838	positive regulation of actin filament polymerization	2	81	1.14	0.0462	9606.ENSP00000363482,9606.ENSP00000485627	FAM21C,WASH1
GO:0032268	regulation of cellular protein metabolic process	10	2486	0.35	0.0474	9606.ENSP00000233893,9606.ENSP00000251968,9606.ENSP00000304697,9606.ENSP00000331201,9606.ENSP00000342755,9606.ENSP00000366565,9606.ENSP00000373620,9606.ENSP00000388107,9606.ENSP00000441543,9606.ENSP00000485627	HSPE1,TSG101,UBB,HGS,RNF41,VPS28,HSPD1,UBA52,UBC,WASH1
GO:0031329	regulation of cellular catabolic process	5	743	0.58	0.0477	9606.ENSP00000304697,9606.ENSP00000342755,9606.ENSP00000388107,9606.ENSP00000441543,9606.ENSP00000485627	UBB,RNF41,UBA52,UBC,WASH1
GO:0006919	activation of cysteine-type endopeptidase activity involved in apoptotic process	2	85	1.12	0.0499	9606.ENSP00000233893,9606.ENSP00000373620	HSPE1,HSPD1

## Sheet: 42 direct enrichment.Component
#term ID	term description	observed gene count	background gene count	strength	false discovery rate	matching proteins in your network (IDs)	matching proteins in your network (labels)
GO:0031984	organelle subcompartment	19	1616	0.75	2.04e-08	9606.ENSP00000216366,9606.ENSP00000219368,9606.ENSP00000240851,9606.ENSP00000246841,9606.ENSP00000261842,9606.ENSP00000276461,9606.ENSP00000306788,9606.ENSP00000333212,9606.ENSP00000341562,9606.ENSP00000346809,9606.ENSP00000351832,9606.ENSP00000352603,9606.ENSP00000354032,9606.ENSP00000358582,9606.ENSP00000367343,9606.ENSP00000367590,9606.ENSP00000376303,9606.ENSP00000407509,9606.ENSP00000410964	AP4S1,FA2H,TFG,FLRT1,AP4E1,ERLIN2,ARL6IP1,CYP2U1,B4GALNT1,PGAP1,RAB3GAP2,AP4M1,BSCL2,AP4B1,GBA2,REEP2,CPT1C,PNPLA6,ERLIN1
GO:0030124	AP-4 adaptor complex	4	5	2.58	1.79e-07	9606.ENSP00000216366,9606.ENSP00000261842,9606.ENSP00000352603,9606.ENSP00000358582	AP4S1,AP4E1,AP4M1,AP4B1
GO:0031090	organelle membrane	23	3337	0.52	1.08e-06	9606.ENSP00000204566,9606.ENSP00000216366,9606.ENSP00000219368,9606.ENSP00000240851,9606.ENSP00000246841,9606.ENSP00000261842,9606.ENSP00000268704,9606.ENSP00000276461,9606.ENSP00000306788,9606.ENSP00000318629,9606.ENSP00000333212,9606.ENSP00000341562,9606.ENSP00000346809,9606.ENSP00000351832,9606.ENSP00000352603,9606.ENSP00000354032,9606.ENSP00000358582,9606.ENSP00000367343,9606.ENSP00000367590,…	SPG21,AP4S1,FA2H,TFG,FLRT1,AP4E1,SPG7,ERLIN2,ARL6IP1,VPS37A,CYP2U1,B4GALNT1,PGAP1,RAB3GAP2,AP4M1,BSCL2,AP4B1,GBA2,REEP2,CPT1C,PNPLA6,ERLIN1,SPG20
GO:0005789	endoplasmic reticulum membrane	13	1022	0.78	4.41e-06	9606.ENSP00000219368,9606.ENSP00000246841,9606.ENSP00000276461,9606.ENSP00000306788,9606.ENSP00000333212,9606.ENSP00000346809,9606.ENSP00000351832,9606.ENSP00000354032,9606.ENSP00000367343,9606.ENSP00000367590,9606.ENSP00000376303,9606.ENSP00000407509,9606.ENSP00000410964	FA2H,FLRT1,ERLIN2,ARL6IP1,CYP2U1,PGAP1,RAB3GAP2,BSCL2,GBA2,REEP2,CPT1C,PNPLA6,ERLIN1
GO:0012505	endomembrane system	25	4347	0.44	4.41e-06	9606.ENSP00000204566,9606.ENSP00000216366,9606.ENSP00000219368,9606.ENSP00000240851,9606.ENSP00000246841,9606.ENSP00000261842,9606.ENSP00000276461,9606.ENSP00000306788,9606.ENSP00000307491,9606.ENSP00000318629,9606.ENSP00000320821,9606.ENSP00000333212,9606.ENSP00000333395,9606.ENSP00000341562,9606.ENSP00000346809,9606.ENSP00000351832,9606.ENSP00000352603,9606.ENSP00000354032,9606.ENSP00000358582,…	SPG21,AP4S1,FA2H,TFG,FLRT1,AP4E1,ERLIN2,ARL6IP1,WDR48,VPS37A,KIF1C,CYP2U1,ARSI,B4GALNT1,PGAP1,RAB3GAP2,AP4M1,BSCL2,AP4B1,GBA2,REEP2,CPT1C,PNPLA6,ERLIN1,KIF1A
GO:0098827	endoplasmic reticulum subcompartment	13	1025	0.78	4.41e-06	9606.ENSP00000219368,9606.ENSP00000246841,9606.ENSP00000276461,9606.ENSP00000306788,9606.ENSP00000333212,9606.ENSP00000346809,9606.ENSP00000351832,9606.ENSP00000354032,9606.ENSP00000367343,9606.ENSP00000367590,9606.ENSP00000376303,9606.ENSP00000407509,9606.ENSP00000410964	FA2H,FLRT1,ERLIN2,ARL6IP1,CYP2U1,PGAP1,RAB3GAP2,BSCL2,GBA2,REEP2,CPT1C,PNPLA6,ERLIN1
GO:0005783	endoplasmic reticulum	16	1796	0.63	6.32e-06	9606.ENSP00000219368,9606.ENSP00000240851,9606.ENSP00000246841,9606.ENSP00000276461,9606.ENSP00000306788,9606.ENSP00000320821,9606.ENSP00000333212,9606.ENSP00000333395,9606.ENSP00000346809,9606.ENSP00000351832,9606.ENSP00000354032,9606.ENSP00000367343,9606.ENSP00000367590,9606.ENSP00000376303,9606.ENSP00000407509,9606.ENSP00000410964	FA2H,TFG,FLRT1,ERLIN2,ARL6IP1,KIF1C,CYP2U1,ARSI,PGAP1,RAB3GAP2,BSCL2,GBA2,REEP2,CPT1C,PNPLA6,ERLIN1
GO:0031904	endosome lumen	4	34	1.75	2.23e-05	9606.ENSP00000216366,9606.ENSP00000261842,9606.ENSP00000352603,9606.ENSP00000358582	AP4S1,AP4E1,AP4M1,AP4B1
GO:0032588	trans-Golgi network membrane	4	91	1.32	0.00064	9606.ENSP00000216366,9606.ENSP00000261842,9606.ENSP00000352603,9606.ENSP00000358582	AP4S1,AP4E1,AP4M1,AP4B1
GO:0016020	membrane	30	8420	0.23	0.0011	9606.ENSP00000204566,9606.ENSP00000216366,9606.ENSP00000219368,9606.ENSP00000240851,9606.ENSP00000246841,9606.ENSP00000261842,9606.ENSP00000261866,9606.ENSP00000268704,9606.ENSP00000276461,9606.ENSP00000306788,9606.ENSP00000318629,9606.ENSP00000333212,9606.ENSP00000341562,9606.ENSP00000346809,9606.ENSP00000351832,9606.ENSP00000352603,9606.ENSP00000354032,9606.ENSP00000355675,9606.ENSP00000356130,…	SPG21,AP4S1,FA2H,TFG,FLRT1,AP4E1,SPG11,SPG7,ERLIN2,ARL6IP1,VPS37A,CYP2U1,B4GALNT1,PGAP1,RAB3GAP2,AP4M1,BSCL2,GJC2,DSTYK,AP4B1,L1CAM,ENTPD1,GBA2,REEP2,CPT1C,PNPLA6,ERLIN1,SPG20,SLC16A2,PLP1
GO:0030424	axon	7	530	0.8	0.0013	9606.ENSP00000261866,9606.ENSP00000320821,9606.ENSP00000355675,9606.ENSP00000359077,9606.ENSP00000376303,9606.ENSP00000408979,9606.ENSP00000438388	SPG11,KIF1C,GJC2,L1CAM,CPT1C,KIF5A,KIF1A
GO:1904115	axon cytoplasm	3	46	1.49	0.0016	9606.ENSP00000320821,9606.ENSP00000408979,9606.ENSP00000438388	KIF1C,KIF5A,KIF1A
GO:0005871	kinesin complex	3	52	1.44	0.0021	9606.ENSP00000320821,9606.ENSP00000408979,9606.ENSP00000438388	KIF1C,KIF5A,KIF1A
GO:0098796	membrane protein complex	9	1047	0.61	0.0026	9606.ENSP00000216366,9606.ENSP00000261842,9606.ENSP00000268704,9606.ENSP00000306788,9606.ENSP00000318629,9606.ENSP00000352603,9606.ENSP00000355675,9606.ENSP00000358582,9606.ENSP00000376303	AP4S1,AP4E1,SPG7,ARL6IP1,VPS37A,AP4M1,GJC2,AP4B1,CPT1C
GO:0098588	bounding membrane of organelle	12	1950	0.47	0.0044	9606.ENSP00000204566,9606.ENSP00000216366,9606.ENSP00000240851,9606.ENSP00000261842,9606.ENSP00000306788,9606.ENSP00000318629,9606.ENSP00000341562,9606.ENSP00000352603,9606.ENSP00000358582,9606.ENSP00000367343,9606.ENSP00000376303,9606.ENSP00000414147	SPG21,AP4S1,TFG,AP4E1,ARL6IP1,VPS37A,B4GALNT1,AP4M1,AP4B1,GBA2,CPT1C,SPG20
GO:0000139	Golgi membrane	7	712	0.67	0.0054	9606.ENSP00000216366,9606.ENSP00000240851,9606.ENSP00000261842,9606.ENSP00000341562,9606.ENSP00000352603,9606.ENSP00000358582,9606.ENSP00000367343	AP4S1,TFG,AP4E1,B4GALNT1,AP4M1,AP4B1,GBA2
GO:0036477	somatodendritic compartment	7	731	0.66	0.0061	9606.ENSP00000246841,9606.ENSP00000261866,9606.ENSP00000355675,9606.ENSP00000359077,9606.ENSP00000376303,9606.ENSP00000408979,9606.ENSP00000438388	FLRT1,SPG11,GJC2,L1CAM,CPT1C,KIF5A,KIF1A
GO:0030131	clathrin adaptor complex	2	24	1.6	0.0094	9606.ENSP00000352603,9606.ENSP00000358582	AP4M1,AP4B1
GO:0098791	Golgi subcompartment	7	801	0.62	0.0094	9606.ENSP00000216366,9606.ENSP00000240851,9606.ENSP00000261842,9606.ENSP00000341562,9606.ENSP00000352603,9606.ENSP00000358582,9606.ENSP00000367343	AP4S1,TFG,AP4E1,B4GALNT1,AP4M1,AP4B1,GBA2
GO:0005737	cytoplasm	33	11238	0.15	0.0112	9606.ENSP00000204566,9606.ENSP00000216366,9606.ENSP00000219368,9606.ENSP00000240851,9606.ENSP00000246841,9606.ENSP00000261842,9606.ENSP00000261866,9606.ENSP00000268704,9606.ENSP00000276461,9606.ENSP00000306788,9606.ENSP00000307491,9606.ENSP00000318629,9606.ENSP00000320821,9606.ENSP00000327104,9606.ENSP00000333212,9606.ENSP00000333395,9606.ENSP00000339479,9606.ENSP00000341562,9606.ENSP00000346809,…	SPG21,AP4S1,FA2H,TFG,FLRT1,AP4E1,SPG11,SPG7,ERLIN2,ARL6IP1,WDR48,VPS37A,KIF1C,DDHD1,CYP2U1,ARSI,NT5C2,B4GALNT1,PGAP1,RAB3GAP2,AP4M1,BSCL2,IBA57,DSTYK,AP4B1,GBA2,REEP2,CPT1C,PNPLA6,KIF5A,ERLIN1,SPG20,KIF1A
GO:0005768	endosome	7	876	0.58	0.0139	9606.ENSP00000204566,9606.ENSP00000216366,9606.ENSP00000261842,9606.ENSP00000307491,9606.ENSP00000318629,9606.ENSP00000352603,9606.ENSP00000358582	SPG21,AP4S1,AP4E1,WDR48,VPS37A,AP4M1,AP4B1
GO:0043005	neuron projection	8	1142	0.52	0.0143	9606.ENSP00000246841,9606.ENSP00000261866,9606.ENSP00000320821,9606.ENSP00000355675,9606.ENSP00000359077,9606.ENSP00000376303,9606.ENSP00000408979,9606.ENSP00000438388	FLRT1,SPG11,KIF1C,GJC2,L1CAM,CPT1C,KIF5A,KIF1A
GO:0043025	neuronal cell body	5	460	0.71	0.0163	9606.ENSP00000246841,9606.ENSP00000355675,9606.ENSP00000359077,9606.ENSP00000408979,9606.ENSP00000438388	FLRT1,GJC2,L1CAM,KIF5A,KIF1A
GO:0005794	Golgi apparatus	9	1474	0.46	0.0176	9606.ENSP00000204566,9606.ENSP00000216366,9606.ENSP00000240851,9606.ENSP00000261842,9606.ENSP00000320821,9606.ENSP00000341562,9606.ENSP00000352603,9606.ENSP00000358582,9606.ENSP00000367343	SPG21,AP4S1,TFG,AP4E1,KIF1C,B4GALNT1,AP4M1,AP4B1,GBA2
GO:0005623	cell	40	16271	0.07	0.0246	9606.ENSP00000204566,9606.ENSP00000216366,9606.ENSP00000219368,9606.ENSP00000240851,9606.ENSP00000246841,9606.ENSP00000251119,9606.ENSP00000261842,9606.ENSP00000261866,9606.ENSP00000268704,9606.ENSP00000276461,9606.ENSP00000286067,9606.ENSP00000306788,9606.ENSP00000307491,9606.ENSP00000318629,9606.ENSP00000320821,9606.ENSP00000327104,9606.ENSP00000333212,9606.ENSP00000333395,9606.ENSP00000339479,…	SPG21,AP4S1,FA2H,TFG,FLRT1,ZFYVE26,AP4E1,SPG11,SPG7,ERLIN2,C10orf12,ARL6IP1,WDR48,VPS37A,KIF1C,DDHD1,CYP2U1,ARSI,NT5C2,B4GALNT1,PGAP1,RAB3GAP2,AP4M1,BSCL2,IBA57,GJC2,DSTYK,AP4B1,L1CAM,ENTPD1,GBA2,REEP2,CPT1C,PNPLA6,KIF5A,ERLIN1,SPG20,KIF1A,SLC16A2,PLP1
GO:0016021	integral component of membrane	19	5155	0.25	0.0246	9606.ENSP00000219368,9606.ENSP00000246841,9606.ENSP00000268704,9606.ENSP00000276461,9606.ENSP00000306788,9606.ENSP00000333212,9606.ENSP00000341562,9606.ENSP00000346809,9606.ENSP00000354032,9606.ENSP00000355675,9606.ENSP00000359077,9606.ENSP00000360250,9606.ENSP00000367343,9606.ENSP00000367590,9606.ENSP00000376303,9606.ENSP00000407509,9606.ENSP00000410964,9606.ENSP00000465734,9606.ENSP00000481006	FA2H,FLRT1,SPG7,ERLIN2,ARL6IP1,CYP2U1,B4GALNT1,PGAP1,BSCL2,GJC2,L1CAM,ENTPD1,GBA2,REEP2,CPT1C,PNPLA6,ERLIN1,SLC16A2,PLP1
GO:0030425	dendrite	5	531	0.65	0.0246	9606.ENSP00000261866,9606.ENSP00000359077,9606.ENSP00000376303,9606.ENSP00000408979,9606.ENSP00000438388	SPG11,L1CAM,CPT1C,KIF5A,KIF1A
GO:0005874	microtubule	4	385	0.7	0.0377	9606.ENSP00000320821,9606.ENSP00000367590,9606.ENSP00000408979,9606.ENSP00000438388	KIF1C,REEP2,KIF5A,KIF1A

## Sheet: 42 direct enrichment.Process
#term ID	term description	observed gene count	background gene count	strength	false discovery rate	matching proteins in your network (IDs)	matching proteins in your network (labels)
GO:1990049	retrograde neuronal dense core vesicle transport	3	5	2.46	0.00045	9606.ENSP00000320821,9606.ENSP00000408979,9606.ENSP00000438388	KIF1C,KIF5A,KIF1A
GO:0046907	intracellular transport	13	1390	0.65	0.00051	9606.ENSP00000216366,9606.ENSP00000240851,9606.ENSP00000261842,9606.ENSP00000261866,9606.ENSP00000306788,9606.ENSP00000318629,9606.ENSP00000320821,9606.ENSP00000351832,9606.ENSP00000352603,9606.ENSP00000358582,9606.ENSP00000367590,9606.ENSP00000408979,9606.ENSP00000438388	AP4S1,TFG,AP4E1,SPG11,ARL6IP1,VPS37A,KIF1C,RAB3GAP2,AP4M1,AP4B1,REEP2,KIF5A,KIF1A
GO:0006629	lipid metabolic process	12	1192	0.68	0.00055	9606.ENSP00000219368,9606.ENSP00000276461,9606.ENSP00000327104,9606.ENSP00000333212,9606.ENSP00000341562,9606.ENSP00000346809,9606.ENSP00000354032,9606.ENSP00000367343,9606.ENSP00000376303,9606.ENSP00000407509,9606.ENSP00000410964,9606.ENSP00000481006	FA2H,ERLIN2,DDHD1,CYP2U1,B4GALNT1,PGAP1,BSCL2,GBA2,CPT1C,PNPLA6,ERLIN1,PLP1
GO:0008088	axo-dendritic transport	4	49	1.59	0.00055	9606.ENSP00000261866,9606.ENSP00000320821,9606.ENSP00000408979,9606.ENSP00000438388	SPG11,KIF1C,KIF5A,KIF1A
GO:0006886	intracellular protein transport	9	836	0.71	0.0043	9606.ENSP00000216366,9606.ENSP00000261842,9606.ENSP00000306788,9606.ENSP00000351832,9606.ENSP00000352603,9606.ENSP00000358582,9606.ENSP00000367590,9606.ENSP00000408979,9606.ENSP00000438388	AP4S1,AP4E1,ARL6IP1,RAB3GAP2,AP4M1,AP4B1,REEP2,KIF5A,KIF1A
GO:0015031	protein transport	11	1391	0.58	0.007	9606.ENSP00000216366,9606.ENSP00000261842,9606.ENSP00000306788,9606.ENSP00000318629,9606.ENSP00000346809,9606.ENSP00000351832,9606.ENSP00000352603,9606.ENSP00000358582,9606.ENSP00000367590,9606.ENSP00000408979,9606.ENSP00000438388	AP4S1,AP4E1,ARL6IP1,VPS37A,PGAP1,RAB3GAP2,AP4M1,AP4B1,REEP2,KIF5A,KIF1A
GO:0016482	cytosolic transport	4	132	1.16	0.007	9606.ENSP00000320821,9606.ENSP00000352603,9606.ENSP00000408979,9606.ENSP00000438388	KIF1C,AP4M1,KIF5A,KIF1A
GO:0032933	SREBP signaling pathway	2	6	2.2	0.007	9606.ENSP00000276461,9606.ENSP00000410964	ERLIN2,ERLIN1
GO:0045541	negative regulation of cholesterol biosynthetic process	2	5	2.28	0.007	9606.ENSP00000276461,9606.ENSP00000410964	ERLIN2,ERLIN1
GO:0051650	establishment of vesicle localization	5	218	1.04	0.007	9606.ENSP00000240851,9606.ENSP00000261866,9606.ENSP00000320821,9606.ENSP00000408979,9606.ENSP00000438388	TFG,SPG11,KIF1C,KIF5A,KIF1A
GO:1990048	anterograde neuronal dense core vesicle transport	2	5	2.28	0.007	9606.ENSP00000320821,9606.ENSP00000438388	KIF1C,KIF1A
GO:0016042	lipid catabolic process	5	265	0.95	0.0073	9606.ENSP00000327104,9606.ENSP00000354032,9606.ENSP00000367343,9606.ENSP00000376303,9606.ENSP00000407509	DDHD1,BSCL2,GBA2,CPT1C,PNPLA6
GO:0051179	localization	22	5233	0.3	0.0073	9606.ENSP00000216366,9606.ENSP00000240851,9606.ENSP00000261842,9606.ENSP00000261866,9606.ENSP00000268704,9606.ENSP00000276461,9606.ENSP00000306788,9606.ENSP00000318629,9606.ENSP00000320821,9606.ENSP00000341562,9606.ENSP00000346809,9606.ENSP00000351832,9606.ENSP00000352603,9606.ENSP00000354032,9606.ENSP00000355675,9606.ENSP00000358582,9606.ENSP00000359077,9606.ENSP00000367590,9606.ENSP00000408979,…	AP4S1,TFG,AP4E1,SPG11,SPG7,ERLIN2,ARL6IP1,VPS37A,KIF1C,B4GALNT1,PGAP1,RAB3GAP2,AP4M1,BSCL2,GJC2,AP4B1,L1CAM,REEP2,KIF5A,ERLIN1,KIF1A,SLC16A2
GO:0006810	transport	19	4130	0.34	0.0079	9606.ENSP00000216366,9606.ENSP00000240851,9606.ENSP00000261842,9606.ENSP00000261866,9606.ENSP00000268704,9606.ENSP00000276461,9606.ENSP00000306788,9606.ENSP00000318629,9606.ENSP00000320821,9606.ENSP00000346809,9606.ENSP00000351832,9606.ENSP00000352603,9606.ENSP00000355675,9606.ENSP00000358582,9606.ENSP00000367590,9606.ENSP00000408979,9606.ENSP00000410964,9606.ENSP00000438388,9606.ENSP00000465734	AP4S1,TFG,AP4E1,SPG11,SPG7,ERLIN2,ARL6IP1,VPS37A,KIF1C,PGAP1,RAB3GAP2,AP4M1,GJC2,AP4B1,REEP2,KIF5A,ERLIN1,KIF1A,SLC16A2
GO:0071786	endoplasmic reticulum tubular network organization	2	12	1.9	0.0101	9606.ENSP00000306788,9606.ENSP00000367590	ARL6IP1,REEP2
GO:0045717	negative regulation of fatty acid biosynthetic process	2	14	1.83	0.0119	9606.ENSP00000276461,9606.ENSP00000410964	ERLIN2,ERLIN1
GO:0033036	macromolecule localization	13	2268	0.44	0.012	9606.ENSP00000216366,9606.ENSP00000261842,9606.ENSP00000306788,9606.ENSP00000318629,9606.ENSP00000341562,9606.ENSP00000346809,9606.ENSP00000351832,9606.ENSP00000352603,9606.ENSP00000354032,9606.ENSP00000358582,9606.ENSP00000367590,9606.ENSP00000408979,9606.ENSP00000438388	AP4S1,AP4E1,ARL6IP1,VPS37A,B4GALNT1,PGAP1,RAB3GAP2,AP4M1,BSCL2,AP4B1,REEP2,KIF5A,KIF1A
GO:0006605	protein targeting	5	318	0.88	0.0122	9606.ENSP00000216366,9606.ENSP00000261842,9606.ENSP00000306788,9606.ENSP00000352603,9606.ENSP00000358582	AP4S1,AP4E1,ARL6IP1,AP4M1,AP4B1
GO:0006643	membrane lipid metabolic process	4	195	0.99	0.015	9606.ENSP00000219368,9606.ENSP00000341562,9606.ENSP00000346809,9606.ENSP00000367343	FA2H,B4GALNT1,PGAP1,GBA2
GO:0022010	central nervous system myelination	2	17	1.75	0.015	9606.ENSP00000219368,9606.ENSP00000481006	FA2H,PLP1
GO:0044255	cellular lipid metabolic process	8	946	0.61	0.015	9606.ENSP00000219368,9606.ENSP00000333212,9606.ENSP00000341562,9606.ENSP00000346809,9606.ENSP00000367343,9606.ENSP00000376303,9606.ENSP00000407509,9606.ENSP00000481006	FA2H,CYP2U1,B4GALNT1,PGAP1,GBA2,CPT1C,PNPLA6,PLP1
GO:0061024	membrane organization	7	729	0.66	0.015	9606.ENSP00000219368,9606.ENSP00000240851,9606.ENSP00000261866,9606.ENSP00000268704,9606.ENSP00000306788,9606.ENSP00000367590,9606.ENSP00000408979	FA2H,TFG,SPG11,SPG7,ARL6IP1,REEP2,KIF5A
GO:0071702	organic substance transport	12	2040	0.45	0.015	9606.ENSP00000216366,9606.ENSP00000261842,9606.ENSP00000306788,9606.ENSP00000318629,9606.ENSP00000346809,9606.ENSP00000351832,9606.ENSP00000352603,9606.ENSP00000358582,9606.ENSP00000367590,9606.ENSP00000408979,9606.ENSP00000438388,9606.ENSP00000465734	AP4S1,AP4E1,ARL6IP1,VPS37A,PGAP1,RAB3GAP2,AP4M1,AP4B1,REEP2,KIF5A,KIF1A,SLC16A2
GO:0045833	negative regulation of lipid metabolic process	3	84	1.23	0.0151	9606.ENSP00000276461,9606.ENSP00000354032,9606.ENSP00000410964	ERLIN2,BSCL2,ERLIN1
GO:0034389	lipid droplet organization	2	19	1.7	0.0162	9606.ENSP00000354032,9606.ENSP00000414147	BSCL2,SPG20
GO:0009056	catabolic process	11	1859	0.45	0.0224	9606.ENSP00000276461,9606.ENSP00000318629,9606.ENSP00000327104,9606.ENSP00000339479,9606.ENSP00000352510,9606.ENSP00000354032,9606.ENSP00000360250,9606.ENSP00000367343,9606.ENSP00000376303,9606.ENSP00000407509,9606.ENSP00000410964	ERLIN2,VPS37A,DDHD1,NT5C2,TECPR2,BSCL2,ENTPD1,GBA2,CPT1C,PNPLA6,ERLIN1
GO:0006664	glycolipid metabolic process	3	104	1.14	0.0249	9606.ENSP00000341562,9606.ENSP00000346809,9606.ENSP00000367343	B4GALNT1,PGAP1,GBA2
GO:0007399	nervous system development	12	2206	0.41	0.0249	9606.ENSP00000219368,9606.ENSP00000246841,9606.ENSP00000261866,9606.ENSP00000268704,9606.ENSP00000346809,9606.ENSP00000355675,9606.ENSP00000359077,9606.ENSP00000367343,9606.ENSP00000408979,9606.ENSP00000414147,9606.ENSP00000438388,9606.ENSP00000481006	FA2H,FLRT1,SPG11,SPG7,PGAP1,GJC2,L1CAM,GBA2,KIF5A,SPG20,KIF1A,PLP1
GO:0032594	protein transport within lipid bilayer	2	26	1.56	0.0249	9606.ENSP00000367590,9606.ENSP00000408979	REEP2,KIF5A
GO:1901575	organic substance catabolic process	10	1609	0.47	0.0249	9606.ENSP00000276461,9606.ENSP00000318629,9606.ENSP00000327104,9606.ENSP00000339479,9606.ENSP00000354032,9606.ENSP00000360250,9606.ENSP00000367343,9606.ENSP00000376303,9606.ENSP00000407509,9606.ENSP00000410964	ERLIN2,VPS37A,DDHD1,NT5C2,BSCL2,ENTPD1,GBA2,CPT1C,PNPLA6,ERLIN1
GO:0019915	lipid storage	2	28	1.53	0.0278	9606.ENSP00000341562,9606.ENSP00000354032	B4GALNT1,BSCL2
GO:0046467	membrane lipid biosynthetic process	3	127	1.05	0.0362	9606.ENSP00000219368,9606.ENSP00000341562,9606.ENSP00000346809	FA2H,B4GALNT1,PGAP1
GO:0032787	monocarboxylic acid metabolic process	5	477	0.7	0.043	9606.ENSP00000219368,9606.ENSP00000333212,9606.ENSP00000367343,9606.ENSP00000376303,9606.ENSP00000481006	FA2H,CYP2U1,GBA2,CPT1C,PLP1
GO:0006631	fatty acid metabolic process	4	294	0.81	0.0448	9606.ENSP00000219368,9606.ENSP00000333212,9606.ENSP00000376303,9606.ENSP00000481006	FA2H,CYP2U1,CPT1C,PLP1
GO:0006665	sphingolipid metabolic process	3	143	1	0.0452	9606.ENSP00000219368,9606.ENSP00000341562,9606.ENSP00000367343	FA2H,B4GALNT1,GBA2
GO:0022008	neurogenesis	9	1519	0.45	0.0468	9606.ENSP00000219368,9606.ENSP00000246841,9606.ENSP00000261866,9606.ENSP00000355675,9606.ENSP00000359077,9606.ENSP00000367343,9606.ENSP00000408979,9606.ENSP00000414147,9606.ENSP00000481006	FA2H,FLRT1,SPG11,GJC2,L1CAM,GBA2,KIF5A,SPG20,PLP1

## Sheet: 42 indirect enrichment.Componen
#term ID	term description	observed gene count	background gene count	strength	false discovery rate	matching proteins in your network (IDs)	matching proteins in your network (labels)
GO:0031984	organelle subcompartment	22	1616	0.64	3.19e-07	9606.ENSP00000216366,9606.ENSP00000219368,9606.ENSP00000240851,9606.ENSP00000246841,9606.ENSP00000261842,9606.ENSP00000272317,9606.ENSP00000276461,9606.ENSP00000306788,9606.ENSP00000333212,9606.ENSP00000341562,9606.ENSP00000346809,9606.ENSP00000351832,9606.ENSP00000352603,9606.ENSP00000354032,9606.ENSP00000358582,9606.ENSP00000367343,9606.ENSP00000367590,9606.ENSP00000376303,9606.ENSP00000407509,…	AP4S1,FA2H,TFG,FLRT1,AP4E1,RPS27A,ERLIN2,ARL6IP1,CYP2U1,B4GALNT1,PGAP1,RAB3GAP2,AP4M1,BSCL2,AP4B1,GBA2,REEP2,CPT1C,PNPLA6,ERLIN1,RAB3GAP1,UBC
GO:0030124	AP-4 adaptor complex	4	5	2.41	1.13e-06	9606.ENSP00000216366,9606.ENSP00000261842,9606.ENSP00000352603,9606.ENSP00000358582	AP4S1,AP4E1,AP4M1,AP4B1
GO:0031090	organelle membrane	29	3337	0.45	2.83e-06	9606.ENSP00000204566,9606.ENSP00000216366,9606.ENSP00000219368,9606.ENSP00000240851,9606.ENSP00000246841,9606.ENSP00000251968,9606.ENSP00000261842,9606.ENSP00000268704,9606.ENSP00000272317,9606.ENSP00000276461,9606.ENSP00000297661,9606.ENSP00000306788,9606.ENSP00000318629,9606.ENSP00000333212,9606.ENSP00000341562,9606.ENSP00000346809,9606.ENSP00000351832,9606.ENSP00000352603,9606.ENSP00000354032,…	SPG21,AP4S1,FA2H,TFG,FLRT1,TSG101,AP4E1,SPG7,RPS27A,ERLIN2,UBAP1,ARL6IP1,VPS37A,CYP2U1,B4GALNT1,PGAP1,RAB3GAP2,AP4M1,BSCL2,AP4B1,VPS28,GBA2,REEP2,CPT1C,PNPLA6,ERLIN1,RAB3GAP1,SPG20,UBC
GO:0000813	ESCRT I complex	4	10	2.11	3.81e-06	9606.ENSP00000251968,9606.ENSP00000297661,9606.ENSP00000318629,9606.ENSP00000366565	TSG101,UBAP1,VPS37A,VPS28
GO:0005789	endoplasmic reticulum membrane	16	1022	0.7	3.81e-06	9606.ENSP00000219368,9606.ENSP00000246841,9606.ENSP00000272317,9606.ENSP00000276461,9606.ENSP00000306788,9606.ENSP00000333212,9606.ENSP00000346809,9606.ENSP00000351832,9606.ENSP00000354032,9606.ENSP00000367343,9606.ENSP00000367590,9606.ENSP00000376303,9606.ENSP00000407509,9606.ENSP00000410964,9606.ENSP00000411418,9606.ENSP00000441543	FA2H,FLRT1,RPS27A,ERLIN2,ARL6IP1,CYP2U1,PGAP1,RAB3GAP2,BSCL2,GBA2,REEP2,CPT1C,PNPLA6,ERLIN1,RAB3GAP1,UBC
GO:0098827	endoplasmic reticulum subcompartment	16	1025	0.7	3.81e-06	9606.ENSP00000219368,9606.ENSP00000246841,9606.ENSP00000272317,9606.ENSP00000276461,9606.ENSP00000306788,9606.ENSP00000333212,9606.ENSP00000346809,9606.ENSP00000351832,9606.ENSP00000354032,9606.ENSP00000367343,9606.ENSP00000367590,9606.ENSP00000376303,9606.ENSP00000407509,9606.ENSP00000410964,9606.ENSP00000411418,9606.ENSP00000441543	FA2H,FLRT1,RPS27A,ERLIN2,ARL6IP1,CYP2U1,PGAP1,RAB3GAP2,BSCL2,GBA2,REEP2,CPT1C,PNPLA6,ERLIN1,RAB3GAP1,UBC
GO:0012505	endomembrane system	32	4347	0.37	6.31e-06	9606.ENSP00000204566,9606.ENSP00000216366,9606.ENSP00000219368,9606.ENSP00000230050,9606.ENSP00000240851,9606.ENSP00000246841,9606.ENSP00000251968,9606.ENSP00000261842,9606.ENSP00000272317,9606.ENSP00000276461,9606.ENSP00000297661,9606.ENSP00000306788,9606.ENSP00000307491,9606.ENSP00000318629,9606.ENSP00000320821,9606.ENSP00000333212,9606.ENSP00000333395,9606.ENSP00000341562,9606.ENSP00000346809,…	SPG21,AP4S1,FA2H,RPS12,TFG,FLRT1,TSG101,AP4E1,RPS27A,ERLIN2,UBAP1,ARL6IP1,WDR48,VPS37A,KIF1C,CYP2U1,ARSI,B4GALNT1,PGAP1,RAB3GAP2,AP4M1,BSCL2,AP4B1,VPS28,GBA2,REEP2,CPT1C,PNPLA6,ERLIN1,RAB3GAP1,KIF1A,UBC
GO:0022626	cytosolic ribosome	6	78	1.39	6.31e-06	9606.ENSP00000222247,9606.ENSP00000225430,9606.ENSP00000230050,9606.ENSP00000251453,9606.ENSP00000262584,9606.ENSP00000272317	RPL18A,RPL19,RPS12,RPS16,RPL8,RPS27A
GO:0005783	endoplasmic reticulum	19	1796	0.53	2.94e-05	9606.ENSP00000219368,9606.ENSP00000240851,9606.ENSP00000246841,9606.ENSP00000272317,9606.ENSP00000276461,9606.ENSP00000306788,9606.ENSP00000320821,9606.ENSP00000333212,9606.ENSP00000333395,9606.ENSP00000346809,9606.ENSP00000351832,9606.ENSP00000354032,9606.ENSP00000367343,9606.ENSP00000367590,9606.ENSP00000376303,9606.ENSP00000407509,9606.ENSP00000410964,9606.ENSP00000411418,9606.ENSP00000441543	FA2H,TFG,FLRT1,RPS27A,ERLIN2,ARL6IP1,KIF1C,CYP2U1,ARSI,PGAP1,RAB3GAP2,BSCL2,GBA2,REEP2,CPT1C,PNPLA6,ERLIN1,RAB3GAP1,UBC
GO:0031904	endosome lumen	4	34	1.58	0.0001	9606.ENSP00000216366,9606.ENSP00000261842,9606.ENSP00000352603,9606.ENSP00000358582	AP4S1,AP4E1,AP4M1,AP4B1
GO:0044391	ribosomal subunit	6	152	1.1	0.00016	9606.ENSP00000222247,9606.ENSP00000225430,9606.ENSP00000230050,9606.ENSP00000251453,9606.ENSP00000262584,9606.ENSP00000272317	RPL18A,RPL19,RPS12,RPS16,RPL8,RPS27A
GO:0005768	endosome	12	876	0.64	0.00022	9606.ENSP00000204566,9606.ENSP00000216366,9606.ENSP00000251968,9606.ENSP00000261842,9606.ENSP00000272317,9606.ENSP00000297661,9606.ENSP00000307491,9606.ENSP00000318629,9606.ENSP00000352603,9606.ENSP00000358582,9606.ENSP00000366565,9606.ENSP00000441543	SPG21,AP4S1,TSG101,AP4E1,RPS27A,UBAP1,WDR48,VPS37A,AP4M1,AP4B1,VPS28,UBC
GO:0005871	kinesin complex	4	52	1.39	0.00037	9606.ENSP00000320821,9606.ENSP00000408979,9606.ENSP00000414982,9606.ENSP00000438388	KIF1C,KIF5A,KLC1,KIF1A
GO:0098588	bounding membrane of organelle	17	1950	0.45	0.00084	9606.ENSP00000204566,9606.ENSP00000216366,9606.ENSP00000240851,9606.ENSP00000251968,9606.ENSP00000261842,9606.ENSP00000272317,9606.ENSP00000297661,9606.ENSP00000306788,9606.ENSP00000318629,9606.ENSP00000341562,9606.ENSP00000352603,9606.ENSP00000358582,9606.ENSP00000366565,9606.ENSP00000367343,9606.ENSP00000376303,9606.ENSP00000414147,9606.ENSP00000441543	SPG21,AP4S1,TFG,TSG101,AP4E1,RPS27A,UBAP1,ARL6IP1,VPS37A,B4GALNT1,AP4M1,AP4B1,VPS28,GBA2,CPT1C,SPG20,UBC
GO:0098796	membrane protein complex	12	1047	0.57	0.00096	9606.ENSP00000216366,9606.ENSP00000251968,9606.ENSP00000261842,9606.ENSP00000268704,9606.ENSP00000297661,9606.ENSP00000306788,9606.ENSP00000318629,9606.ENSP00000352603,9606.ENSP00000355675,9606.ENSP00000358582,9606.ENSP00000366565,9606.ENSP00000376303	AP4S1,TSG101,AP4E1,SPG7,UBAP1,ARL6IP1,VPS37A,AP4M1,GJC2,AP4B1,VPS28,CPT1C
GO:0005737	cytoplasm	49	11238	0.15	0.0015	9606.ENSP00000204566,9606.ENSP00000216366,9606.ENSP00000219368,9606.ENSP00000222247,9606.ENSP00000225430,9606.ENSP00000230050,9606.ENSP00000240851,9606.ENSP00000246841,9606.ENSP00000251453,9606.ENSP00000251968,9606.ENSP00000259469,9606.ENSP00000261427,9606.ENSP00000261842,9606.ENSP00000261866,9606.ENSP00000262584,9606.ENSP00000264552,9606.ENSP00000264926,9606.ENSP00000268704,9606.ENSP00000272317,…	SPG21,AP4S1,FA2H,RPL18A,RPL19,RPS12,TFG,FLRT1,RPS16,TSG101,RPL35,UBE2K,AP4E1,SPG11,RPL8,UBE2S,RAD18,SPG7,RPS27A,ERLIN2,UBAP1,ARL6IP1,WDR48,VPS37A,KIF1C,DDHD1,CYP2U1,ARSI,NT5C2,B4GALNT1,PGAP1,RAB3GAP2,AP4M1,BSCL2,IBA57,DSTYK,AP4B1,VPS28,GBA2,REEP2,CPT1C,PNPLA6,KIF5A,ERLIN1,RAB3GAP1,SPG20,KLC1,KIF1A,UBC
GO:0005829	cytosol	29	4958	0.27	0.0015	9606.ENSP00000204566,9606.ENSP00000222247,9606.ENSP00000225430,9606.ENSP00000230050,9606.ENSP00000240851,9606.ENSP00000251453,9606.ENSP00000251968,9606.ENSP00000259469,9606.ENSP00000261427,9606.ENSP00000261866,9606.ENSP00000262584,9606.ENSP00000264552,9606.ENSP00000272317,9606.ENSP00000276461,9606.ENSP00000297661,9606.ENSP00000318629,9606.ENSP00000327104,9606.ENSP00000339479,9606.ENSP00000351832,…	SPG21,RPL18A,RPL19,RPS12,TFG,RPS16,TSG101,RPL35,UBE2K,SPG11,RPL8,UBE2S,RPS27A,ERLIN2,UBAP1,VPS37A,DDHD1,NT5C2,RAB3GAP2,AP4M1,DSTYK,AP4B1,VPS28,KIF5A,RAB3GAP1,SPG20,KLC1,KIF1A,UBC
GO:0042788	polysomal ribosome	3	30	1.51	0.0015	9606.ENSP00000222247,9606.ENSP00000225430,9606.ENSP00000262584	RPL18A,RPL19,RPL8
GO:0022625	cytosolic large ribosomal subunit	3	32	1.48	0.0016	9606.ENSP00000222247,9606.ENSP00000225430,9606.ENSP00000262584	RPL18A,RPL19,RPL8
GO:0032588	trans-Golgi network membrane	4	91	1.15	0.0018	9606.ENSP00000216366,9606.ENSP00000261842,9606.ENSP00000352603,9606.ENSP00000358582	AP4S1,AP4E1,AP4M1,AP4B1
GO:0032991	protein-containing complex	28	4792	0.27	0.0018	9606.ENSP00000216366,9606.ENSP00000222247,9606.ENSP00000225430,9606.ENSP00000230050,9606.ENSP00000251453,9606.ENSP00000251968,9606.ENSP00000261842,9606.ENSP00000262584,9606.ENSP00000264552,9606.ENSP00000264926,9606.ENSP00000268704,9606.ENSP00000272317,9606.ENSP00000276461,9606.ENSP00000297661,9606.ENSP00000306788,9606.ENSP00000318629,9606.ENSP00000320821,9606.ENSP00000351832,9606.ENSP00000352603,…	AP4S1,RPL18A,RPL19,RPS12,RPS16,TSG101,AP4E1,RPL8,UBE2S,RAD18,SPG7,RPS27A,ERLIN2,UBAP1,ARL6IP1,VPS37A,KIF1C,RAB3GAP2,AP4M1,GJC2,AP4B1,VPS28,CPT1C,KIF5A,ERLIN1,RAB3GAP1,KLC1,KIF1A
GO:0030424	axon	8	530	0.68	0.0019	9606.ENSP00000261866,9606.ENSP00000320821,9606.ENSP00000355675,9606.ENSP00000359077,9606.ENSP00000376303,9606.ENSP00000408979,9606.ENSP00000414982,9606.ENSP00000438388	SPG11,KIF1C,GJC2,L1CAM,CPT1C,KIF5A,KLC1,KIF1A
GO:0043229	intracellular organelle	51	12193	0.13	0.0019	9606.ENSP00000204566,9606.ENSP00000216366,9606.ENSP00000219368,9606.ENSP00000222247,9606.ENSP00000225430,9606.ENSP00000230050,9606.ENSP00000240851,9606.ENSP00000246841,9606.ENSP00000251119,9606.ENSP00000251453,9606.ENSP00000251968,9606.ENSP00000259469,9606.ENSP00000261427,9606.ENSP00000261842,9606.ENSP00000261866,9606.ENSP00000262584,9606.ENSP00000264552,9606.ENSP00000264926,9606.ENSP00000268704,…	SPG21,AP4S1,FA2H,RPL18A,RPL19,RPS12,TFG,FLRT1,ZFYVE26,RPS16,TSG101,RPL35,UBE2K,AP4E1,SPG11,RPL8,UBE2S,RAD18,SPG7,RPS27A,ERLIN2,USP12,C10orf12,UBAP1,ARL6IP1,WDR48,VPS37A,KIF1C,CYP2U1,ARSI,B4GALNT1,USP1,PGAP1,RAB3GAP2,AP4M1,BSCL2,IBA57,AP4B1,VPS28,GBA2,REEP2,CPT1C,WDR20,PNPLA6,KIF5A,ERLIN1,RAB3GAP1,SPG20,KLC1,KIF1A,UBC
GO:0022627	cytosolic small ribosomal subunit	3	38	1.4	0.002	9606.ENSP00000230050,9606.ENSP00000251453,9606.ENSP00000272317	RPS12,RPS16,RPS27A
GO:1904115	axon cytoplasm	3	46	1.32	0.0033	9606.ENSP00000320821,9606.ENSP00000408979,9606.ENSP00000438388	KIF1C,KIF5A,KIF1A
GO:0010008	endosome membrane	7	457	0.69	0.0037	9606.ENSP00000204566,9606.ENSP00000251968,9606.ENSP00000272317,9606.ENSP00000297661,9606.ENSP00000318629,9606.ENSP00000366565,9606.ENSP00000441543	SPG21,TSG101,RPS27A,UBAP1,VPS37A,VPS28,UBC
GO:0031410	cytoplasmic vesicle	16	2226	0.36	0.0067	9606.ENSP00000204566,9606.ENSP00000216366,9606.ENSP00000246841,9606.ENSP00000251968,9606.ENSP00000261842,9606.ENSP00000261866,9606.ENSP00000272317,9606.ENSP00000297661,9606.ENSP00000307491,9606.ENSP00000318629,9606.ENSP00000352603,9606.ENSP00000358582,9606.ENSP00000366565,9606.ENSP00000414982,9606.ENSP00000438388,9606.ENSP00000441543	SPG21,AP4S1,FLRT1,TSG101,AP4E1,SPG11,RPS27A,UBAP1,WDR48,VPS37A,AP4M1,AP4B1,VPS28,KLC1,KIF1A,UBC
GO:0005623	cell	59	16271	0.07	0.0069	9606.ENSP00000204566,9606.ENSP00000216366,9606.ENSP00000219368,9606.ENSP00000222247,9606.ENSP00000225430,9606.ENSP00000230050,9606.ENSP00000240851,9606.ENSP00000246841,9606.ENSP00000251119,9606.ENSP00000251453,9606.ENSP00000251968,9606.ENSP00000259469,9606.ENSP00000261427,9606.ENSP00000261842,9606.ENSP00000261866,9606.ENSP00000262584,9606.ENSP00000264552,9606.ENSP00000264926,9606.ENSP00000268704,…	SPG21,AP4S1,FA2H,RPL18A,RPL19,RPS12,TFG,FLRT1,ZFYVE26,RPS16,TSG101,RPL35,UBE2K,AP4E1,SPG11,RPL8,UBE2S,RAD18,SPG7,RPS27A,ERLIN2,USP12,C10orf12,UBAP1,ARL6IP1,WDR48,VPS37A,KIF1C,DDHD1,CYP2U1,ARSI,NT5C2,B4GALNT1,USP1,PGAP1,RAB3GAP2,AP4M1,BSCL2,IBA57,GJC2,DSTYK,AP4B1,L1CAM,ENTPD1,VPS28,GBA2,REEP2,CPT1C,WDR20,PNPLA6,KIF5A,ERLIN1,RAB3GAP1,SPG20,KLC1,KIF1A,UBC,SLC16A2,PLP1
GO:0043209	myelin sheath	4	157	0.91	0.0085	9606.ENSP00000272317,9606.ENSP00000355675,9606.ENSP00000441543,9606.ENSP00000481006	RPS27A,GJC2,UBC,PLP1
GO:0005794	Golgi apparatus	12	1474	0.42	0.0091	9606.ENSP00000204566,9606.ENSP00000216366,9606.ENSP00000230050,9606.ENSP00000240851,9606.ENSP00000261842,9606.ENSP00000297661,9606.ENSP00000320821,9606.ENSP00000341562,9606.ENSP00000352603,9606.ENSP00000358582,9606.ENSP00000367343,9606.ENSP00000411418	SPG21,AP4S1,RPS12,TFG,AP4E1,UBAP1,KIF1C,B4GALNT1,AP4M1,AP4B1,GBA2,RAB3GAP1
GO:0005741	mitochondrial outer membrane	4	181	0.85	0.0128	9606.ENSP00000272317,9606.ENSP00000376303,9606.ENSP00000414147,9606.ENSP00000441543	RPS27A,CPT1C,SPG20,UBC
GO:0005622	intracellular	54	14286	0.08	0.0132	9606.ENSP00000204566,9606.ENSP00000216366,9606.ENSP00000219368,9606.ENSP00000222247,9606.ENSP00000225430,9606.ENSP00000230050,9606.ENSP00000240851,9606.ENSP00000246841,9606.ENSP00000251119,9606.ENSP00000251453,9606.ENSP00000251968,9606.ENSP00000259469,9606.ENSP00000261427,9606.ENSP00000261842,9606.ENSP00000261866,9606.ENSP00000262584,9606.ENSP00000264552,9606.ENSP00000264926,9606.ENSP00000268704,…	SPG21,AP4S1,FA2H,RPL18A,RPL19,RPS12,TFG,FLRT1,ZFYVE26,RPS16,TSG101,RPL35,UBE2K,AP4E1,SPG11,RPL8,UBE2S,RAD18,SPG7,RPS27A,ERLIN2,USP12,C10orf12,UBAP1,ARL6IP1,WDR48,VPS37A,KIF1C,DDHD1,CYP2U1,ARSI,NT5C2,B4GALNT1,USP1,PGAP1,RAB3GAP2,AP4M1,BSCL2,IBA57,DSTYK,AP4B1,VPS28,GBA2,REEP2,CPT1C,WDR20,PNPLA6,KIF5A,ERLIN1,RAB3GAP1,SPG20,KLC1,KIF1A,UBC
GO:0030131	clathrin adaptor complex	2	24	1.43	0.0132	9606.ENSP00000352603,9606.ENSP00000358582	AP4M1,AP4B1
GO:0043227	membrane-bounded organelle	46	11244	0.12	0.0132	9606.ENSP00000204566,9606.ENSP00000216366,9606.ENSP00000219368,9606.ENSP00000230050,9606.ENSP00000240851,9606.ENSP00000246841,9606.ENSP00000251453,9606.ENSP00000251968,9606.ENSP00000259469,9606.ENSP00000261427,9606.ENSP00000261842,9606.ENSP00000261866,9606.ENSP00000264552,9606.ENSP00000264926,9606.ENSP00000268704,9606.ENSP00000272317,9606.ENSP00000276461,9606.ENSP00000282344,9606.ENSP00000286067,…	SPG21,AP4S1,FA2H,RPS12,TFG,FLRT1,RPS16,TSG101,RPL35,UBE2K,AP4E1,SPG11,UBE2S,RAD18,SPG7,RPS27A,ERLIN2,USP12,C10orf12,UBAP1,ARL6IP1,WDR48,VPS37A,KIF1C,CYP2U1,ARSI,B4GALNT1,USP1,PGAP1,RAB3GAP2,AP4M1,BSCL2,IBA57,AP4B1,VPS28,GBA2,REEP2,CPT1C,WDR20,PNPLA6,ERLIN1,RAB3GAP1,SPG20,KLC1,KIF1A,UBC
GO:0043231	intracellular membrane-bounded organelle	43	10365	0.12	0.0174	9606.ENSP00000204566,9606.ENSP00000216366,9606.ENSP00000219368,9606.ENSP00000230050,9606.ENSP00000240851,9606.ENSP00000246841,9606.ENSP00000251453,9606.ENSP00000251968,9606.ENSP00000259469,9606.ENSP00000261427,9606.ENSP00000261842,9606.ENSP00000261866,9606.ENSP00000264552,9606.ENSP00000264926,9606.ENSP00000268704,9606.ENSP00000272317,9606.ENSP00000276461,9606.ENSP00000282344,9606.ENSP00000286067,…	SPG21,AP4S1,FA2H,RPS12,TFG,FLRT1,RPS16,TSG101,RPL35,UBE2K,AP4E1,SPG11,UBE2S,RAD18,SPG7,RPS27A,ERLIN2,USP12,C10orf12,UBAP1,ARL6IP1,WDR48,VPS37A,KIF1C,CYP2U1,ARSI,B4GALNT1,USP1,PGAP1,RAB3GAP2,AP4M1,BSCL2,IBA57,AP4B1,GBA2,REEP2,CPT1C,WDR20,PNPLA6,ERLIN1,RAB3GAP1,SPG20,UBC
GO:0043657	host cell	2	29	1.34	0.0174	9606.ENSP00000272317,9606.ENSP00000441543	RPS27A,UBC
GO:0005770	late endosome	4	234	0.74	0.0242	9606.ENSP00000251968,9606.ENSP00000307491,9606.ENSP00000318629,9606.ENSP00000366565	TSG101,WDR48,VPS37A,VPS28
GO:0044215	other organism	2	36	1.25	0.0242	9606.ENSP00000272317,9606.ENSP00000441543	RPS27A,UBC
GO:0044216	other organism cell	2	36	1.25	0.0242	9606.ENSP00000272317,9606.ENSP00000441543	RPS27A,UBC
GO:0000139	Golgi membrane	7	712	0.5	0.0244	9606.ENSP00000216366,9606.ENSP00000240851,9606.ENSP00000261842,9606.ENSP00000341562,9606.ENSP00000352603,9606.ENSP00000358582,9606.ENSP00000367343	AP4S1,TFG,AP4E1,B4GALNT1,AP4M1,AP4B1,GBA2
GO:0005874	microtubule	5	385	0.62	0.0258	9606.ENSP00000320821,9606.ENSP00000367590,9606.ENSP00000408979,9606.ENSP00000414982,9606.ENSP00000438388	KIF1C,REEP2,KIF5A,KLC1,KIF1A
GO:0031902	late endosome membrane	3	125	0.89	0.026	9606.ENSP00000251968,9606.ENSP00000318629,9606.ENSP00000366565	TSG101,VPS37A,VPS28
GO:0015630	microtubule cytoskeleton	9	1118	0.41	0.0262	9606.ENSP00000251119,9606.ENSP00000251968,9606.ENSP00000264926,9606.ENSP00000318629,9606.ENSP00000320821,9606.ENSP00000367590,9606.ENSP00000408979,9606.ENSP00000414982,9606.ENSP00000438388	ZFYVE26,TSG101,RAD18,VPS37A,KIF1C,REEP2,KIF5A,KLC1,KIF1A
GO:0036477	somatodendritic compartment	7	731	0.49	0.0262	9606.ENSP00000246841,9606.ENSP00000261866,9606.ENSP00000355675,9606.ENSP00000359077,9606.ENSP00000376303,9606.ENSP00000408979,9606.ENSP00000438388	FLRT1,SPG11,GJC2,L1CAM,CPT1C,KIF5A,KIF1A
GO:0016020	membrane	36	8420	0.14	0.0289	9606.ENSP00000204566,9606.ENSP00000216366,9606.ENSP00000219368,9606.ENSP00000240851,9606.ENSP00000246841,9606.ENSP00000251968,9606.ENSP00000261842,9606.ENSP00000261866,9606.ENSP00000268704,9606.ENSP00000272317,9606.ENSP00000276461,9606.ENSP00000297661,9606.ENSP00000306788,9606.ENSP00000318629,9606.ENSP00000333212,9606.ENSP00000341562,9606.ENSP00000346809,9606.ENSP00000351832,9606.ENSP00000352603,…	SPG21,AP4S1,FA2H,TFG,FLRT1,TSG101,AP4E1,SPG11,SPG7,RPS27A,ERLIN2,UBAP1,ARL6IP1,VPS37A,CYP2U1,B4GALNT1,PGAP1,RAB3GAP2,AP4M1,BSCL2,GJC2,DSTYK,AP4B1,L1CAM,ENTPD1,VPS28,GBA2,REEP2,CPT1C,PNPLA6,ERLIN1,RAB3GAP1,SPG20,UBC,SLC16A2,PLP1
GO:0043005	neuron projection	9	1142	0.4	0.0289	9606.ENSP00000246841,9606.ENSP00000261866,9606.ENSP00000320821,9606.ENSP00000355675,9606.ENSP00000359077,9606.ENSP00000376303,9606.ENSP00000408979,9606.ENSP00000414982,9606.ENSP00000438388	FLRT1,SPG11,KIF1C,GJC2,L1CAM,CPT1C,KIF5A,KLC1,KIF1A
GO:0098791	Golgi subcompartment	7	801	0.45	0.0395	9606.ENSP00000216366,9606.ENSP00000240851,9606.ENSP00000261842,9606.ENSP00000341562,9606.ENSP00000352603,9606.ENSP00000358582,9606.ENSP00000367343	AP4S1,TFG,AP4E1,B4GALNT1,AP4M1,AP4B1,GBA2
GO:0043025	neuronal cell body	5	460	0.54	0.0461	9606.ENSP00000246841,9606.ENSP00000355675,9606.ENSP00000359077,9606.ENSP00000408979,9606.ENSP00000438388	FLRT1,GJC2,L1CAM,KIF5A,KIF1A
GO:0030496	midbody	3	165	0.77	0.0478	9606.ENSP00000251119,9606.ENSP00000251968,9606.ENSP00000414147	ZFYVE26,TSG101,SPG20

[truncated: 5 more sheets: 42 indirect enrichment.Process, 57 direct enrichment.Component, 57 direct enrichment.Process, 57 indirect enrichment.Componen, 57 indirect enrichment.Process]
